1 **Modeling the relationship between estimated foliar fungicide use and soybean yield losses**  
2 **due to foliar fungal diseases in the United States.**

3

4 **Short title: Foliar fungicide use and soybean yield losses**

5

6 Authors: Ananda Y. Bandara, Dilooshi K. Weerasooriya, Shawn P. Conley, Carl A. Bradley,  
7 Tom W. Allen, Paul D. Esker\*

8

9

10 Affiliations: Ananda Y. Bandara (axb1739@psu.edu), Dilooshi K. Weerasooriya  
11 (wkw18@psu.edu), Paul D. Esker (pde6@psu.edu): Department of Plant Pathology and  
12 Environmental Microbiology, 211 Buckhout Lab, Pennsylvania State University, University Park,  
13 PA 16802 USA; Shawn P. Conley (spconley@wisc.edu): Department of Agronomy, University of  
14 Wisconsin-Madison, 1575 Linden Drive, Madison, WI 53706 USA; Carl A. Bradley  
15 (carl.bradley@uky.edu): Department of Plant Pathology, University of Kentucky Research and  
16 Education Center, Princeton, KY 42445 USA; Tom W. Allen (tom.allen@msstate.edu): Delta  
17 Research and Extension Center, Mississippi State University, Stoneville, MS 38776 USA

18

19 \*Corresponding author: Paul D. Esker

20

21 Submit to: *PLOS One*

22

23 **ABSTRACT**

24

25 Fungicide use in the United States to manage soybean diseases has increased in recent years. The  
26 ability of fungicides to reduce disease-associated yield losses varies greatly depending on multiple  
27 factors. Nonetheless, historical data are useful to understand the broad sense and long-term trends  
28 related to fungicide use practices. In the current study, the relationship between estimated soybean  
29 yield losses due to selected foliar diseases and foliar fungicide use was investigated using annual  
30 data from 28 soybean growing states over the period of 2005 to 2015. At a national scale, a  
31 significant quadratic relationship was observed between total estimated yield losses and total  
32 fungicide use ( $R^2 = 0.123$ ,  $P < 0.0001$ ) where yield losses initially increased, reached a plateau,  
33 and subsequently decreased with increasing fungicide use. The positive phase of the quadratic  
34 curve could be associated with insufficient amount of fungicides being used to manage targeted  
35 diseases, application of more-than-recommended prophylactic fungicides under no/low disease  
36 pressure, application of curative fungicides after economic injury level, and reduced fungicide  
37 efficacy due to a variety of factors such as unfavorable environmental conditions and resistance of  
38 targeted pathogen populations to the specific active ingredient applied. Interestingly, a significant  
39 quadratic relationship was also observed between total soybean production and total foliar  
40 fungicide use ( $R^2 = 0.36$ ,  $P < 0.0001$ ). The positive phase of the quadratic curve may suggest that  
41 factors like plant physiological changes, including increased chlorophyll content, photosynthetic  
42 rates, water use efficiency, and delayed senescence that have been widely reported to occur after  
43 application of certain foliar fungicides could have potentially contributed to enhanced yield.  
44 Therefore, the current study provides evidence of the potential usefulness of foliar fungicide  
45 applications to mitigate soybean yield losses associated with foliar diseases and their potential to

46 positively impact soybean production/yield at national and regional scales although discrepancies  
47 to the general trends observed at national and regional scales do prevail at the local (state) level.

48

49

## 50 INTRODUCTION

51

52 Soybean [*Glycine max* (L.) Merrill] is a key agricultural commodity in the United States and has  
53 been cultivated on 34.7 million hectares on average annually between 2015 and 2019 (USDA-  
54 NASS). Similar to the production of other economically important crops, numerous abiotic and  
55 biotic stressors like adverse weather, variation in soil characteristics, diseases, insects, and weeds  
56 present enormous challenges to soybean production [1, 2]. Soybean diseases are detrimental to  
57 production due to their deleterious effects on yield. In the U.S., the average annual disease-  
58 associated soybean yield losses are approximately 11% [3]. However, the relative importance of  
59 diseases and concomitant yield losses vary both temporally and spatially. For example, total yield  
60 losses due to diseases in 2012 was estimated to be 10.07 million metric tons while in 2014 it was  
61 13.94 million metric tons [4]. Among various soybean foliar diseases, Septoria brown spot, caused  
62 by *Septoria glycines* Hemmi, and frogeye leaf spot, caused by *Cercospora sojina* Hara, are the  
63 most common [1, 5-8] and are also considered to be important yield limiting diseases in soybean  
64 [9]. The losses caused by Septoria brown spot range from 196 to 293 kg ha<sup>-1</sup> [6]. Septoria brown  
65 spot can cause up to 2,000 kg ha<sup>-1</sup> loss in high-yield soybean production systems (>5,000 kg ha<sup>-1</sup>)  
66 [10]. Frogeye leaf spot can result in yield losses from 10 to 60% [11] and seed weight reductions  
67 up to 29% [12].

68

69 Different management strategies are deployed either individually or in an integrated manner to  
70 reduce the losses caused by foliar fungal diseases in soybean production systems. Among these,  
71 the use of foliar-applied fungicides has been an important tactic. Fungicide use in soybean has  
72 risen dramatically since 2005 [13]. Several reasons were given to explain this increase including:  
73 increased availability of fungicides for use on soybean, improved awareness of soybean diseases,  
74 the initial observation of soybean rust in North America and the resultant production of specific  
75 chemistries to manage this disease that were not widely used, increased soybean commodity price,  
76 and promotion of certain fungicides by the manufacturers for their potential physiological benefits  
77 that may increase soybean yield even in the absence of disease, a phenomenon in which the term  
78 “plant health” has been coined [14, 15].

79

80 The quinone-outside inhibitor (QoI; strobilurin) class of fungicides (Fungicide Resistance Action  
81 Committee [FRAC] group 11) are commonly used to manage foliar diseases of soybean and these  
82 act by binding with complex III of the mitochondrial respiration pathway [16]. Additionally, the  
83 demethylation inhibitor (DMI; triazole) class of fungicides (FRAC group 3) are also used in  
84 soybean and this class of fungicides inhibit ergosterol biosynthesis by fungi [17]. Recently, active  
85 ingredients from the succinate dehydrogenase inhibiting (SDHI; FRAC group 7) class of  
86 fungicides were introduced for management of foliar soybean diseases. Similar to QoI fungicides,  
87 SDHI fungicides are classified as respiration inhibitors. However, instead of complex III, SDHI  
88 fungicides bind at complex II in the mitochondrial respiration pathway [17]. In general, these  
89 fungicide groups possess broad-spectrum activity on foliar fungal soybean diseases including  
90 *Septoria* brown spot and frogeye leaf spot [18]. The fungicides within these specific chemical  
91 classes can generally be purchased as stand-alone fungicides, especially those products designated

92 as either DMI or QoI. However, stand-alone fungicide products consisting of SDHIs are currently  
93 not available and are included as a pre-mix fungicide that contains either one of the other classes  
94 (either DMI or QoI) or both of the classes as a three-way fungicide product. The current fungicide  
95 production trend from chemical manufacturers is to provide products that contain multiple modes  
96 of action to help reduce the development of fungicide resistance. In general, and to more broadly  
97 classify the chemical classes as outlined above, following the initial observation of soybean rust  
98 in the contiguous U.S., fungicide products were broadly categorized as either curative (DMI) and  
99 preventive (QoI and also SDHI).

100

101 Although foliar fungicides have extensively been used for soybean production, the extent to which  
102 yield losses can actually be mitigated with fungicide application and the subsequent economic  
103 return is often questioned. While fungicides are reported to reduce the yield losses when diseases  
104 are present [19, 20], the impact of fungicide application on yield in the absence of disease, i.e., the  
105 plant health scenario, are inconsistent. Several studies have demonstrated no significant increase  
106 in soybean yield with fungicide applications in the absence of disease [20-23], while other studies  
107 suggested that yield increases can occur with foliar fungicide application even in the absence of  
108 disease [7, 23-25]. Therefore, the economic return following a fungicide application does not  
109 intuitively follow a linear trend due to its apparent dependency on multiple factors such as disease  
110 pressure, class of fungicide being used (i.e., active ingredient), time of application (growth stage  
111 of the plant), and environmental conditions [19, 26, 27].

112

113 Widespread fungicide use can ultimately lead to an increased risk of selecting fungicide-resistant  
114 strains out of the targeted pathogen population. Fungicide resistance is an issue increasing in

115 importance across soybean production areas in the U.S. as a result of automatic fungicide  
116 applications at specific growth stages, as well as fungicide applications with specific fungicide  
117 classes where the goal is a curative response [28-31]. Currently, QoI fungicide resistance has been  
118 reported for several soybean pathogens in the U.S., including *C. sojina*, in Illinois, Tennessee [32],  
119 South Dakota [33], and Mississippi [29]. Zhang et al [31] recently reported QoI resistant *C. sojina*  
120 isolates from 14 states including Alabama, Arkansas, Delaware, Illinois, Indiana, Iowa, Kentucky,  
121 Louisiana, Mississippi, Missouri, North Carolina, Ohio, Tennessee, and Virginia. Additionally,  
122 the fungi responsible for causing Cercospora leaf blight (*C. cf. flagellaris*, *C. kikuchii* (Tak.  
123 Matsumoto & Tomoy.) M.W. Gardner and *C. cf. sigesbeckiae*) have been reported to exhibit  
124 resistance to QoI fungicides throughout Louisiana [28]. Moreover, additional anecdotal,  
125 unpublished reports of resistance within populations of *S. glyinces* and *Corynespora cassiicola*  
126 (Berk. & M.A. Curtis) C.T. Wei, the causal organism of target spot of soybean have recently been  
127 made.

128  
129 In the current paper, we investigate long-term fungicide use patterns and the relationship with  
130 soybean yield and the resulting foliar diseases that cause losses. Our primary spatial grain was at  
131 the state level, although regional and national level trends were also explored. While numerous  
132 individual experiments have been conducted to address the aforementioned issues, a more  
133 comprehensive analysis with long term historical data (estimated fungicide use and soybean yield  
134 losses as a result of diseases) is currently lacking. Thus, our objectives for this study were to (i)  
135 investigate the relationship between foliar fungicide use in the U.S. and estimated yield losses due  
136 to foliar diseases, and (ii) investigate the relationship between foliar fungicide use in the U.S. and  
137 soybean production/yield at national, regional, and state levels. Findings of this study will aid in

138 informed decision making on spatiotemporally sensitive, economically viable, and  
139 environmentally sound use of fungicides to manage soybean fungal diseases in the U.S.  
140 Furthermore, results will also provide useful insights into how research, policy, and educational  
141 efforts should be prioritized in soybean disease management using fungicides.

142

## 143 **MATERIALS AND METHODS**

144

145 **Fungicide use data.** Annual state-level foliar fungicide use estimates (in Kg of active ingredient)  
146 for soybean were obtained from the Pesticide National Synthesis Project webpage  
147 ([https://water.usgs.gov/nawqa/pnsp/usage/maps/county-level/StateLevel/HighEstimate\\_AgPestU](https://water.usgs.gov/nawqa/pnsp/usage/maps/county-level/StateLevel/HighEstimate_AgPestU)  
148 [sebyCropGroup92to16.txt](https://water.usgs.gov/nawqa/pnsp/usage/maps/county-level/StateLevel/HighEstimate_AgPestU)). Foliar fungicides applied to soybean during the period between 2005  
149 and 2015 were considered for this study. The time period was based upon the availability of  
150 fungicide use data spanning 28 soybean growing states (AL, AR, DE, FL, GA, IA, IL, IN, KS,  
151 KY, LA, MD, MI, MN, MO, MS, NC, ND, NE, OH, OK, PA, SC, SD, TN, TX, VA, WI).  
152 Fungicide use data were also classified based on each region where northern states considered for  
153 this study included IL, IN, IA, KS, MI, MN, NE, ND, OH, PA, SD, and WI while southern states  
154 included AL, AR, DE, FL, GA, KY, LA, MD, MS, MO, NC, OK, SC, TN, TX, and VA. The  
155 classification of states into regions was based on the two groups of soybean pathologists collecting  
156 disease loss estimate data, NCERA-137 (North Central Extension and Research Activity for  
157 Soybean Diseases) and the Southern Soybean Disease Workers.

158

159 To compute the fungicide use per unit area within each state (in grams per hectare), the amount  
160 provided in the database (in kg) was first converted to grams (g). The soybean planting and

161 harvesting area was retrieved from USDA-NASS database (<https://quickstats.nass.usda.gov>) for  
162 individual states from 2005 to 2015. Fungicide use values (in g) were divided by respective state-  
163 wide total soybean (i) planted number of hectares and (ii) harvested number of hectares separately  
164 to decide the most appropriate type of explanatory variable (g of fungicide per unit hectareage  
165 planted versus g of fungicide per unit hectareage harvested) for use in the study. A simple linear  
166 regression analysis showed that two variables were linearly and positively related to each other  
167 ( $R^2 = 0.9987$ ,  $P < 0.0001$ ,  $y = 0.965x + 0.211$ ), indicating a high similarity between the two  
168 variables. As such, for this study, we report the fungicide concentration in grams of fungicide per  
169 harvested hectare (here after mentioned as g/ha).

170

171 **Yield loss data.** Historical soybean yield loss estimates were gathered from soybean Extension  
172 specialists and researchers. We considered the soybean losses for the same periods where foliar  
173 fungicide data were also available. Soybean losses spanned the same 28 soybean growing states  
174 as indicated above. The methodology used to collect and report soybean disease losses have been  
175 previously described [4]. Briefly, a spreadsheet was circulated annually to plant pathologists with  
176 soybean responsibilities and they provided estimates of the losses associated with a defined set of  
177 diseases (n=23). However, for the purposes of this study we focused on the results related to foliar  
178 diseases caused by fungi that could be effectively managed by foliar fungicide application. The  
179 methods employed within each state differed with regards to the specific method for estimating  
180 losses; however, in general, some of the methods employed were based on each individual's  
181 evaluation of cultivar trials, fungicide efficacy plots, specific troubleshooting or field calls, queries  
182 of Extension personnel within counties/parishes, statewide plant disease surveys, or plant disease  
183 diagnostic laboratory databases.



184

185 Given that the historical yield loss data were provided in the form of losses in metric tons (MT) of  
186 production, to calculate the loss per soybean disease, we first calculated the loss as a percentage  
187 based on overall production (in MT) per state and year using USDA-NASS data. We then  
188 calculated the overall loss (as a percentage) due to soybean diseases using Padwick's calculation  
189 [40], which is:

190

191 
$$\text{Loss (\%)} = 100 \times \left[ 1 - \frac{(100-Y_1)(100-Y_2)(100-Y_3)\dots(100-Y_n)}{100^n} \right], \text{ where}$$

192

193  $Y_1, Y_2, Y_3, Y_n$ , represent the percentage loss due to disease 1, 2, 3, through n, respectively. To  
194 estimate the loss due to diseases in terms of yield, we used the average soybean yield per state and  
195 year, from which we estimated the yield in the absence of diseases (the percentage loss estimated  
196 using Padwick's calculation). The difference between the state average yield and the estimated  
197 yield in the absence of diseases was considered as the loss.

198

199 **Derivation of soybean yield, harvest, and production zones.** The following categorical variables  
200 to be used in the factor analysis with mixed data (FAMD) and analysis of variance (ANOVA) (see  
201 below for details) were created: (i) Yield zone (1 to 4), based on USDA-NASS estimates at the  
202 state level comparing yield (MT/HA) with all state by year combinations, (ii) Harvest zone (1 to  
203 4), based upon USDA-NASS estimates at the state level comparing harvested area (HA) with all  
204 state by year combinations, and (iii) Production zone (1 to 4), based upon USDA-NASS estimates  
205 at the state level comparing total production (MT) with all state by year combinations. Data points  
206 within the minimum to first quartile were classified as Zone 1. Similarly, data points from the first

207 quartile to median, median to third quartile, and > third quartile were classified as zones 2, 3, and  
208 4, respectively. Note that the zones were not solely defined based on geography, in this case state,  
209 and are a function of time (temporal scale). As such, the zone of a given data point was relative to  
210 the other data points (in terms of yield, harvest area, or total production) within the database. As  
211 yield, harvest area, and production within a given state fluctuated over time, the zone classification  
212 for a given state varied based on the year. The yield, harvest, and production zones corresponding  
213 to foliar fungicide data were therefore derived using soybean yield, harvest, and production data  
214 from 2005 to 2015.

215

216 **Fungicides and their targeted diseases considered.** Based on data available in the fungicide and  
217 yield loss databases combined with soybean fungicide efficacy summarized by Extension plant  
218 pathologists on an annual basis, we concentrated on specific diseases for this study. Foliar  
219 fungicides (n=15) included the following active ingredients within several specific chemical  
220 classes as defined by the FRAC: QoIs (FRAC code 11) = azoxystrobin, fluoxastrobin,  
221 picoxystrobin, pyraclostrobin, trifloxystrobin; DMIs (FRAC code 3) = cyproconazole,  
222 difenoconazole, flutriafol, propiconazole, prothioconazole, tebuconazole, tetraconazole;  
223 chloronitrile (FRAC code M 05) = chlorothalonil; SDHI (FRAC code 7) = fluxapyroxad; and  
224 methyl benzimidazole carbamate (MBC) (FRAC code 1) = thiophanate-methyl. Although  
225 azoxystrobin, pyraclostrobin, and trifloxystrobin have uses as seed-applied fungicides, they were  
226 considered as foliar fungicides for this study as they are predominantly used to manage foliar  
227 diseases of soybean. The targeted diseases for the foliar fungicides listed above included  
228 anthracnose (caused by *Colletotrichum truncatum* (Schwein.) Andrus & W.D. Moore and several  
229 related species), Cercospora leaf blight (purple seed stain: *Cercospora flagellaris*, *C. kikuchii*, *C.*

230 *sigesbeckiae*), frogeye leaf spot (*Cercospora sojina*), Rhizoctonia aerial blight (*Rhizoctonia solani*  
231 J.G. Kühn), Sclerotinia stem rot (White mold: *Sclerotinia sclerotiorum* (Lib.) de Bary), Septoria  
232 brown spot (*Septoria glycines*), and soybean rust (*Phakopsora pachyrhizi* Syd. & P. Syd.).

233

234 **Determination of the relationship between fungicide use and yield losses due to diseases.** The  
235 PROC GLM procedure in SAS (version 9.4, SAS Institute, 2017, Cary, NC) was used to analyze  
236 the strength of relationships (as indicated by the coefficient of determination:  $R^2$ ) at the national,  
237 regional, state levels, as well as at temporal scale (on an annual basis). Linear and second order  
238 polynomial (=quadratic) curves were fitted to determine the most realistic relationship among the  
239 different variables. In cases where both linear and quadratic relations were significant, the  
240 quadratic curve was selected for the interpretation purpose. The higher order (third or more)  
241 polynomial curves were not fitted due to the lack of interpretability despite the possible significant  
242 model *P*-values associated with these curves. The analyses were conducted to examine total  
243 fungicide use (MT) and total yield loss (1,000 MT), as well as total fungicide use per unit harvest  
244 area (g/ha) and total yield loss per unit area (kg/ha). An initial analysis was conducted for the  
245 whole data set (all states, all years) to investigate the national trend over time. Subsequent analyses  
246 were conducted to evaluate different trends at the regional and state level, as well as in temporal  
247 scale. In addition, similar analyses (as indicated above) were performed to investigate the  
248 relationship between fungicide use and soybean production/yield.

249

250 **Factor Analysis with Mixed Data (FAMD).** FAMD is a principal component method to analyze  
251 a data set containing both quantitative and qualitative variables [35]. FAMD makes it possible to  
252 analyze the similarity between individuals (individual data points) by taking into account mixed-

253 variable types. With this analysis, quantitative and qualitative variables are normalized in order to  
254 balance the impact of each set of variables. The packages FactoMineR version 1.41 (for the  
255 analysis) and factoextra (for data visualization) in R (version 3.5.1) were used for FAMD analysis.  
256 Here, total foliar fungicide use in grams of active ingredient (on a per hectare (ha) basis) was used  
257 as a quantitative variable while the year, state, region, soybean yield zone, harvest zone, and  
258 production zones, were incorporated as qualitative variables.

259

260 **Analysis of variance (ANOVA).** To investigate the main effects of yield, harvest, and production  
261 zones on total fungicide use (per ha basis), ANOVA was conducted using the PROC GLIMMIX  
262 procedure in SAS (version 9.4, SAS Institute, Cary, NC) at the 5% significance level. Restricted  
263 maximum likelihood (REML) was used to compute the variance components. Degrees of freedom  
264 for the denominator of F tests were computed using the Kenward-Roger option. Studentized  
265 residual plots and Q-Q plots were respectively used to assess the assumptions of identical and  
266 independent distribution of residuals, and their normality. Appropriate heterogeneous variance  
267 models were fitted whenever heteroskedasticity was observed by specifying a "*random*  
268 *residual/group = x* " statement (where *x* = factor under consideration, ex: yield zone). The  
269 Bayesian information criterion (model with the lowest BIC) was used to select the best fitting  
270 model (between homogenous variance vs heterogeneous variance). Mean separation was  
271 performed with adjustments for multiple comparisons using the Tukey-Kramer test.

272

273 **RESULTS**

274

275 **Temporal fluctuation of soybean fungicide use in the United States.** Considering total  
276 fungicide use (in both MT and g/ha) across 28 soybean growing states, the greatest foliar fungicide  
277 use was recorded in 2007 with the lowest recorded use in 2006 (Fig. 1A). A 63.5% decrease in  
278 foliar fungicide use on a per ha basis was evident from 2007 to 2008. The percentage use increment  
279 from 2006 to 2015 was 317% for total fungicide use in MT and 252% for total fungicide use in  
280 g/ha, respectively. Despite the annual variation, the total concentration of foliar fungicides used in  
281 28 states showed a general increasing trend from 2005 to 2015.

282

283 **Spatial fluctuation of soybean fungicide use in the United States.** Over an 11-year period,  
284 between 2005 and 2015 on a per hectare basis, Louisiana reported the greatest foliar fungicide use  
285 (2,309 g) while Kansas reported the lowest (114 g) (Fig. 1B). In terms of the total foliar fungicide  
286 use (in MT), Florida recorded the lowest (9.7 MT) while Arkansas reported the greatest (1,103.7  
287 MT).

288

289 When considered regionally, the total use (MT) of foliar fungicides was 18.7% greater in the  
290 southern states (6,451.3 MT) compared to northern states (5,431.2 MT) (Fig. 2). Similarly, per  
291 hectare total use (g/ha) of foliar fungicides was 521% greater in the southern states (17,437.2 g/ha)  
292 compared to the northern states (2,805.7 g/ha) (Fig. 2).

293

294 **Preventive vs curative fungicides.** In general, the QoI class of fungicides, commonly referred to  
295 as strobilurins are used as preventative fungicides while DMI (or triazoles) are used as curative  
296 fungicides. Temporal fluctuations (summed across states) showed that the use of both types of  
297 fungicides increased from 2005 to 2015 (Fig. 3A). The amount of preventive and curative

298 fungicides used in 2015 were 3.34 and 4.2-fold greater compared to their use in 2005. The use of  
299 QoI fungicides, representing  $\sum$  azoxystrobin, fluoxastrobin, picoxystrobin, pyraclostrobin, and  
300 trifloxystrobin, was greater compared to curative fungicides representing  $\sum$  cyproconazole,  
301 difenoconazole, propiconazole, prothioconazole, tebuconazole, and tetraconazole for any given  
302 year. Spatially, the greatest and lowest QoI fungicide use, summed across years, was recorded in  
303 Iowa and Florida, respectively, while the greatest and lowest DMI fungicide use was recorded in  
304 Illinois and Florida, respectively (Fig. 3B). In general, QoI fungicide use was greater compared to  
305 DMI fungicides except in a few states (Alabama, Delaware, Georgia, South Carolina, and South  
306 Dakota).

307

308 **Relationship between annual soybean yield losses and annual fungicide use at national and**  
309 **regional levels.** Table 1 shows the coefficient of determination ( $R^2$ ) and corresponding  $P$ -values  
310 for the linear and quadratic relationships between yield losses and fungicide use at the national and  
311 regional levels. The analysis of the complete data set at the national level revealed a significant  
312 quadratic relationship between total yield losses due to foliar diseases (1,000 MT) and total foliar  
313 fungicide use (MT) during the period from 2005 to 2015 (Fig. 4A). Based on this relationship, the  
314 total yield losses initially increased, reached a plateau, and subsequently decreased with increasing  
315 fungicide use. When the losses (kg) and fungicide use (g) were considered on a per hectare basis,  
316 there was no significant linear or quadratic relationship (Fig. 4B).

317

318 **Table 1.** Coefficient of determination ( $R^2$ ) and  $P$ -values from linear and second order polynomial  
 319 (quadratic) regression analyses for the relationship between foliar fungicide use and soybean yield  
 320 losses due to foliar diseases from soybean growing states in the United States ( $\alpha = 0.05$ ) at national  
 321 and regional (north and south) scales. A = relationship between annual total fungicide use (MT)  
 322 and annual total production loss (1,000 MT) during 2005 to 2015. B = relationship between annual  
 323 total fungicide use (g/ha) and annual yield loss (kg/ha) during 2005-2015. Northern states  
 324 considered for this study included IL, IN, IA, KS, MI, MN, NE, ND, OH, PA, SD, and WI while  
 325 southern states included AL, AR, DE, FL, GA, KY, LA, MD, MS, MO, NC, OK, SC, TN, TX,  
 326 and VA.  
 327

| Geographic<br>scale | A      |            |           |            | B      |            |           |            |
|---------------------|--------|------------|-----------|------------|--------|------------|-----------|------------|
|                     | Linear |            | Quadratic |            | Linear |            | Quadratic |            |
|                     | $R^2$  | $P$ -value | $R^2$     | $P$ -value | $R^2$  | $P$ -value | $R^2$     | $P$ -value |
| National            | 0.0683 | < 0.0001   | 0.1227    | < 0.0001   | 0.0012 | 0.5368     | 0.0016    | 0.7682     |
| North               | 0.0924 | 0.0004     | 0.0975    | 0.0013     | 0.0864 | 0.0006     | 0.0888    | 0.0025     |
| South               | 0.1671 | < 0.0001   | 0.2157    | < 0.0001   | 0.0279 | 0.0300     | 0.0305    | 0.0686     |

328  
 329 At a regional level (northern and southern), significant quadratic relationships were observed  
 330 between total yield losses due to foliar diseases (1,000 MT) and total foliar fungicide use (MT)  
 331 (Fig. 4C). For both regions, the total yield losses initially increased, reaching a plateau with  
 332 increasing fungicide use. A stronger relationship was observed for the southern states compared  
 333 to the northern states. When the losses (kg) and fungicide use (g) were considered on a per hectare  
 334 basis, a significant quadratic relationship was observed for the northern states while no significant  
 335 quadratic relationship was evident for the southern states (Fig. 4D). However, the linear  
 336 relationship was significant and positive for southern states (Table 1).  
 337

338 **Relationship between annual soybean yield losses and annual fungicide use at the state level.**

339 **Table 2** presents the coefficient of determination ( $R^2$ ) and corresponding  $P$ -values from linear and  
 340 quadratic regression analyses for foliar fungicide use and soybean yield losses due to foliar  
 341 diseases. A positive linear relationship was observed between total yield losses (1,000 MT) and  
 342 total fungicide use (MT) for Florida ( $y = 0.52x + 0.3$ ), Indiana ( $y = 4.36x - 166.7$ ), Kentucky ( $y$   
 343  $= 0.65x - 7.2$ ), and Pennsylvania ( $y = 6.49x + 21.3$ ) while a significant quadratic relationship was  
 344 observed for Louisiana ( $y = 0.001x^2 + 0.16x + 27.1$ ), Missouri ( $y = 0.069x^2 - 5.65x + 126.0$ ), and  
 345 Virginia ( $y = -0.030x^2 + 1.64x - 4.1$ ). When losses (kg) and fungicide use (g) were considered on  
 346 a per hectare basis, a negative linear relationship was observed for South Carolina ( $y = -0.07x +$   
 347  $37.3$ ) while a significant quadratic relationship was evident for Indiana ( $y = -0.613x^2 + 38.9x -$   
 348  $551.3$ ), Louisiana ( $y = 3E-06x^2 + 0.35x + 61.3$ ) and Missouri ( $y = 0.1473x^2 - 6.07x + 67.7$ ).

349  
 350 **Table 2.** Coefficient of determination ( $R^2$ ) and corresponding  $P$ -values from linear and second  
 351 order polynomial (quadratic) regression analyses for the relationship between foliar fungicide use  
 352 and soybean yield losses due to foliar diseases from soybean growing states in the United States  
 353 ( $\alpha = 0.05$ ). A = relationship between annual total fungicide use (MT) and annual total production  
 354 loss (1,000 MT) during 2005 to 2015. B = relationship between annual total fungicide use (g/ha)  
 355 and annual yield loss (kg/ha) during 2005 to 2015. Bold values indicate significant  $P$ -values and  
 356 associated  $R^2$  values.

357

| Region | State    | A            |               |           |        | B            |               |              |               |
|--------|----------|--------------|---------------|-----------|--------|--------------|---------------|--------------|---------------|
|        |          | Linear       |               | Quadratic |        | Linear       |               | Quadratic    |               |
|        |          | $R^2$        | $P$           | $R^2$     | $P$    | $R^2$        | $P$           | $R^2$        | $P$           |
| North  | Illinois | 0.051        | 0.5037        | 0.051     | 0.8098 | 0.081        | 0.3967        | 0.101        | 0.6512        |
|        | Indiana  | <b>0.484</b> | <b>0.0174</b> | 0.514     | 0.0558 | <b>0.421</b> | <b>0.0307</b> | <b>0.630</b> | <b>0.0188</b> |



|                |              |                   |              |               |              |               |              |               |
|----------------|--------------|-------------------|--------------|---------------|--------------|---------------|--------------|---------------|
| Iowa           | 0.007        | 0.8127            | 0.007        | 0.9739        | 0.000        | 0.9593        | 0.001        | 0.9940        |
| Kansas         | 0.004        | 0.8612            | 0.072        | 0.7426        | 0.000        | 0.9912        | 0.042        | 0.8420        |
| Michigan       | 0.048        | 0.5163            | 0.073        | 0.7399        | 0.037        | 0.5726        | 0.054        | 0.8019        |
| Minnesota      | 0.090        | 0.3698            | 0.328        | 0.2043        | 0.049        | 0.5091        | 0.232        | 0.3472        |
| Nebraska       | 0.061        | 0.4626            | 0.162        | 0.4911        | 0.047        | 0.5196        | 0.165        | 0.4860        |
| North Dakota   | 0.088        | 0.3763            | 0.192        | 0.4269        | 0.024        | 0.6467        | 0.081        | 0.7116        |
| Ohio           | 0.107        | 0.3251            | 0.107        | 0.6346        | 0.086        | 0.3805        | 0.088        | 0.6903        |
| Pennsylvania   | <b>0.442</b> | <b>0.0255</b>     | 0.451        | 0.0911        | 0.310        | 0.0748        | 0.311        | 0.2256        |
| South Dakota   | 0.008        | 0.7869            | 0.095        | 0.6698        | 0.029        | 0.6163        | 0.101        | 0.6543        |
| Wisconsin      | 0.147        | 0.2435            | 0.283        | 0.2636        | 0.098        | 0.3482        | 0.397        | 0.1321        |
| Alabama        | 0.318        | 0.0708            | 0.323        | 0.2102        | 0.011        | 0.7603        | 0.018        | 0.9289        |
| Arkansas       | 0.165        | 0.2145            | 0.304        | 0.2352        | 0.163        | 0.2180        | 0.287        | 0.2583        |
| Delaware       | 0.010        | 0.7678            | 0.049        | 0.8188        | 0.007        | 0.7943        | 0.068        | 0.7535        |
| Florida        | <b>0.428</b> | <b>0.0287</b>     | 0.436        | 0.1006        | 0.001        | 0.9169        | 0.024        | 0.9058        |
| Georgia        | 0.307        | 0.0768            | 0.443        | 0.0960        | 0.077        | 0.4063        | 0.098        | 0.6606        |
| Kentucky       | <b>0.428</b> | <b>0.0288</b>     | 0.429        | 0.1062        | 0.267        | 0.1037        | 0.387        | 0.1409        |
| Louisiana      | <b>0.859</b> | <b>&lt;0.0001</b> | <b>0.868</b> | <b>0.0003</b> | <b>0.717</b> | <b>0.0010</b> | <b>0.717</b> | <b>0.0064</b> |
| Maryland       | 0.009        | 0.7729            | 0.175        | 0.4627        | 0.004        | 0.8465        | 0.164        | 0.4888        |
| Mississippi    | 0.106        | 0.3291            | 0.295        | 0.2466        | 0.038        | 0.5641        | 0.080        | 0.7162        |
| Missouri       | <b>0.425</b> | <b>0.0297</b>     | <b>0.592</b> | <b>0.0277</b> | <b>0.593</b> | <b>0.0055</b> | <b>0.847</b> | <b>0.0006</b> |
| North Carolina | 0.108        | 0.3244            | 0.112        | 0.6215        | 0.099        | 0.3463        | 0.122        | 0.5938        |
| Oklahoma       | 0.068        | 0.4378            | 0.154        | 0.5130        | 0.021        | 0.6694        | 0.033        | 0.8743        |
| South Carolina | 0.064        | 0.4534            | 0.065        | 0.7617        | <b>0.364</b> | <b>0.0495</b> | 0.481        | 0.0724        |
| Tennessee      | 0.003        | 0.8799            | 0.115        | 0.6135        | 0.032        | 0.5974        | 0.088        | 0.6898        |
| Texas          | 0.176        | 0.1984            | 0.177        | 0.4571        | 0.002        | 0.8998        | 0.066        | 0.7599        |
| Virginia       | 0.005        | 0.8361            | <b>0.530</b> | <b>0.0490</b> | 0.043        | 0.5401        | 0.045        | 0.8304        |

358

359 **Relationship between soybean yield losses and fungicide use over time.** Table 3 presents the  
360 coefficient of variation ( $R^2$ ) and corresponding  $P$ -values from linear and quadratic regression  
361 analyses for foliar fungicide use and soybean yield losses due to foliar diseases for soybean  
362 growing states in the United States from 2005 to 2015. A positive linear relationship was observed  
363 between total yield losses due to foliar diseases (1,000 MT) and total foliar fungicide use (MT) in  
364 2006 ( $y = 2.87x + 16.7$ ) and 2010 ( $y = 1.98x + 27.2$ ) while a significant quadratic relationship  
365 was observed in 2008 ( $y = -0.003x^2 + 2.39x - 4.6$ ) and 2015 ( $y = -0.01x^2 + 3.29x - 3.6$ ). When  
366 losses (kg) and fungicide use (g) were considered on a per hectare basis, neither linear nor  
367 quadratic relationships was significant for any given year between 2005 and 2015.

368

369 **Table 3.** Coefficient of determination ( $R^2$ ) and corresponding  $P$ -values from linear and second  
 370 order polynomial (quadratic) regression analyses for the relationship between foliar fungicide use  
 371 and soybean production/yield losses due to foliar diseases from soybean growing states in the  
 372 United States during 2005 to 2015 period ( $\alpha = 0.05$ ). A = relationship between total fungicide use  
 373 (MT) and total soybean production loss (1,000 MT) per state basis. B = relationship between total  
 374 fungicide use (g/ha) and total yield loss (kg/ha) per state basis. Bold values indicate significant  $P$ -  
 375 values and associated  $R^2$  values.

376

377

| Year | A            |               |              |               | B      |        |           |        |
|------|--------------|---------------|--------------|---------------|--------|--------|-----------|--------|
|      | Linear       |               | Quadratic    |               | Linear |        | Quadratic |        |
|      | $R^2$        | $P$           | $R^2$        | $P$           | $R^2$  | $P$    | $R^2$     | $P$    |
| 2005 | 0.044        | 0.2814        | 0.093        | 0.2932        | 0.052  | 0.2431 | 0.091     | 0.3055 |
| 2006 | <b>0.141</b> | <b>0.0488</b> | 0.182        | 0.0814        | 0.000  | 0.9835 | 0.005     | 0.9331 |
| 2007 | 0.000        | 0.9574        | 0.039        | 0.6060        | 0.000  | 0.8857 | 0.003     | 0.9675 |
| 2008 | <b>0.234</b> | <b>0.0091</b> | <b>0.235</b> | <b>0.0354</b> | 0.004  | 0.7471 | 0.022     | 0.7608 |
| 2009 | 0.073        | 0.1633        | 0.207        | 0.0547        | 0.011  | 0.5978 | 0.027     | 0.7083 |
| 2010 | <b>0.176</b> | <b>0.0265</b> | 0.176        | 0.0892        | 0.039  | 0.3079 | 0.046     | 0.5584 |
| 2011 | 0.014        | 0.5439        | 0.045        | 0.5652        | 0.091  | 0.1196 | 0.147     | 0.1361 |
| 2012 | 0.085        | 0.1328        | 0.090        | 0.3086        | 0.048  | 0.2606 | 0.048     | 0.5376 |
| 2013 | 0.022        | 0.4533        | 0.053        | 0.5059        | 0.017  | 0.5022 | 0.044     | 0.5686 |
| 2014 | 0.043        | 0.2869        | 0.203        | 0.0588        | 0.008  | 0.6566 | 0.046     | 0.5554 |
| 2015 | 0.114        | 0.0795        | <b>0.302</b> | <b>0.0112</b> | 0.004  | 0.7464 | 0.074     | 0.3802 |

384

385 **Relationship between annual soybean production/yield and annual fungicide use at national**  
 386 **and regional levels.** Table 4 presents the coefficient of determination ( $R^2$ ) and corresponding  $P$ -  
 387 values for the linear and quadratic relationships between soybean production/yield and fungicide  
 388 use at national and regional level. Analysis of the national level dataset revealed a significant  
 389 quadratic relationship between total annual soybean production (1,000 MT) and total annual foliar  
 390 fungicide use (MT) during the period between 2005 and 2015 (Fig. 5A). The total soybean

391 production initially increased, reached a plateau, and subsequently decreased with increasing  
 392 fungicide use. Although a significant quadratic relationship was observed between soybean yield  
 393 (kg) and fungicide use (g) on a per hectare basis, the yield initially decrease, reaches a plateau, and  
 394 eventually increase slightly with increasing fungicide use (Fig. 5B)

395

396 **Table 4.** Coefficient of determination ( $R^2$ ) and  $P$ -values from linear and second order polynomial  
 397 (quadratic) regression analyses for the relationship between foliar fungicide use and soybean  
 398 production/yield from soybean growing states in the United States ( $\alpha = 0.05$ ) at national and  
 399 regional (north and south) scales. A = relationship between annual total fungicide use (MT) and  
 400 annual total soybean production (1,000 MT) during 2005 to 2015. B = relationship between annual  
 401 total fungicide use (g/ha) and annual yield (kg/ha) during 2005-2015. Northern states considered  
 402 for this study included IL, IN, IA, KS, MI, MN, NE, ND, OH, PA, SD, and WI while southern  
 403 states included AL, AR, DE, FL, GA, KY, LA, MD, MS, MO, NC, OK, SC, TN, TX, and VA.

| Geographic<br>scale | A      |            |           |            | B      |            |           |            |
|---------------------|--------|------------|-----------|------------|--------|------------|-----------|------------|
|                     | Linear |            | Quadratic |            | Linear |            | Quadratic |            |
|                     | $R^2$  | $P$ -value | $R^2$     | $P$ -value | $R^2$  | $P$ -value | $R^2$     | $P$ -value |
| National            | 0.1703 | < 0.0001   | 0.3598    | < 0.0001   | 0.0294 | 0.0025     | 0.0334    | 0.0056     |
| North               | 0.5509 | < 0.0001   | 0.5660    | 0.0002     | 0.0558 | 0.0064     | 0.1189    | 0.0003     |
| South               | 0.2016 | < 0.0001   | 0.3506    | < 0.0001   | 0.0010 | 0.6724     | 0.0249    | 0.1134     |

404

405 At a regional level, a significant quadratic relationship was observed between total annual soybean  
 406 production (1,000 MT) and total annual foliar fungicide use (MT) for both the northern and  
 407 southern states (Fig. 5C). However, the magnitude of the relationship was stronger in the northern  
 408 compared to the southern states. When the annual soybean yield (kg) and annual fungicide use (g)  
 409 were considered on a per hectare basis, a significant quadratic relationship was observed for  
 410 northern states while no significant linear or quadratic relationship was evident for the southern

411 states (Fig. 5D). The quadratic curve fitted for the north showed that soybean yield increase at the  
412 beginning, reached a plateau (at approximately 35 g/ha), and subsequently decreased with  
413 increasing fungicide use.

414

415 **Relationship between annual soybean production/yield and annual fungicide use at state**  
416 **level.** Table 5 presents coefficient of determination ( $R^2$ ) and corresponding  $P$ -values from linear  
417 and quadratic regression analyses for soybean production/yield and foliar fungicide use for  
418 soybean growing states in the U.S. A positive linear relationship was observed between total  
419 soybean production (1,000 MT) and total foliar fungicide use (MT) for Ohio ( $y = 24.8x + 4,796.6$ )  
420 while significant quadratic relationship was evident for Alabama ( $y = -0.387x^2 + 24.9x + 77.4$ ),  
421 Arkansas ( $y = -0.019x^2 + 12.1x + 2,547$ ), Florida ( $y = -14.689x^2 + 41.2x + 4.9$ ), Georgia ( $y = -$   
422  $0.149x^2 + 14.6x + 52.8$ ), Illinois ( $y = 0.632x^2 - 100.6x + 14,835$ ), Kentucky ( $y = -0.986x^2 + 88.2x$   
423  $+ 108.5$ ), Louisiana ( $y = 0.016x^2 - 0.12x + 919.7$ ), Mississippi ( $y = -0.057x^2 + 24.5x + 960.5$ ),  
424 North Dakota ( $y = -0.1x^2 + 30.2x + 2,899.5$ ), Pennsylvania ( $y = -2.777x^2 + 58.5x + 399.9$ ), and  
425 Tennessee ( $y = -0.149x^2 + 40.1x + 154.5$ ). When soybean yield (kg) and fungicide use (g) were  
426 considered on a per hectare basis, a positive linear relationship was observed for Pennsylvania ( $y =$   
427  $8.678x + 2,718.7$ ), while a significant quadratic relationship was observed for Alabama ( $y = -$   
428  $0.096x^2 + 26.5x + 978.4$ ), Arkansas ( $y = -0.029x^2 + 14.7x + 1,532.8$ ), Kentucky ( $y = -0.414x^2 +$   
429  $55.8x + 1,170$ ), and Mississippi ( $y = -0.039x^2 + 18.7x + 1,468.4$ ).

430

431 **Table 5.** Coefficient of determination ( $R^2$ ) and  $P$  values from linear and second order polynomial  
432 (quadratic) regression analyses for the relationship between foliar fungicide use and soybean  
433 production/yield from soybean growing states in the United States ( $\alpha = 0.05$ ). A = relationship

434 between annual total fungicide use (MT) and annual total soybean production (1,000 MT) during  
 435 2005 to 2015. B = relationship between annual total fungicide use (g/ha) and annual yield (kg/ha)  
 436 during 2005 to 2015. Bold values indicate significant *P*-values and associated  $R^2$  values.  
 437

| Region    | State          | A            |               |              |               | B            |               |              |               |
|-----------|----------------|--------------|---------------|--------------|---------------|--------------|---------------|--------------|---------------|
|           |                | Linear       |               | Quadratic    |               | Linear       |               | Quadratic    |               |
|           |                | $R^2$        | <i>P</i>      | $R^2$        | <i>P</i>      | $R^2$        | <i>P</i>      | $R^2$        | <i>P</i>      |
| North     | Illinois       | 0.186        | 0.1853        | <b>0.574</b> | <b>0.0329</b> | 0.229        | 0.1363        | 0.413        | 0.1184        |
|           | Indiana        | 0.350        | 0.0550        | 0.415        | 0.1171        | 0.342        | 0.0588        | 0.344        | 0.1848        |
|           | Iowa           | 0.016        | 0.7144        | 0.026        | 0.8994        | 0.000        | 0.9414        | 0.183        | 0.4465        |
|           | Kansas         | 0.168        | 0.2103        | 0.296        | 0.2462        | 0.051        | 0.5042        | 0.127        | 0.5819        |
|           | Michigan       | 0.105        | 0.3307        | 0.289        | 0.2563        | 0.278        | 0.0953        | 0.393        | 0.1360        |
|           | Minnesota      | 0.084        | 0.3883        | 0.275        | 0.2756        | 0.111        | 0.3161        | 0.333        | 0.1974        |
|           | Nebraska       | 0.283        | 0.0922        | 0.296        | 0.2459        | 0.186        | 0.1853        | 0.223        | 0.3643        |
|           | North Dakota   | <b>0.578</b> | <b>0.0066</b> | <b>0.602</b> | <b>0.0249</b> | 0.131        | 0.2732        | 0.153        | 0.5143        |
|           | Ohio           | <b>0.364</b> | <b>0.0495</b> | 0.501        | 0.0619        | 0.270        | 0.1013        | 0.387        | 0.1411        |
|           | Pennsylvania   | <b>0.539</b> | <b>0.0101</b> | <b>0.632</b> | <b>0.0183</b> | <b>0.430</b> | <b>0.0285</b> | 0.479        | 0.0735        |
|           | South Dakota   | 0.075        | 0.4139        | 0.249        | 0.3175        | 0.002        | 0.8951        | 0.101        | 0.6526        |
| Wisconsin | 0.027          | 0.6261       | 0.110         | 0.6268       | 0.023         | 0.6513       | 0.049         | 0.8197       |               |
| South     | Alabama        | <b>0.458</b> | <b>0.0222</b> | <b>0.539</b> | <b>0.0451</b> | 0.038        | 0.5635        | <b>0.534</b> | <b>0.0472</b> |
|           | Arkansas       | <b>0.636</b> | <b>0.0033</b> | <b>0.719</b> | <b>0.0062</b> | 0.672        | 0.0020        | <b>0.737</b> | <b>0.0048</b> |
|           | Delaware       | 0.200        | 0.1675        | 0.353        | 0.1756        | 0.104        | 0.3324        | 0.330        | 0.2018        |
|           | Florida        | <b>0.472</b> | <b>0.0194</b> | <b>0.712</b> | <b>0.0069</b> | 0.355        | 0.0531        | 0.415        | 0.1170        |
|           | Georgia        | 0.163        | 0.2178        | <b>0.602</b> | <b>0.0250</b> | 0.006        | 0.8201        | 0.116        | 0.6111        |
|           | Kentucky       | <b>0.519</b> | <b>0.0124</b> | <b>0.633</b> | <b>0.0181</b> | <b>0.475</b> | <b>0.0274</b> | <b>0.619</b> | <b>0.0343</b> |
|           | Louisiana      | <b>0.587</b> | <b>0.0060</b> | <b>0.604</b> | <b>0.0247</b> | 0.256        | 0.1120        | 0.429        | 0.1062        |
|           | Maryland       | 0.101        | 0.3397        | 0.504        | 0.0605        | 0.086        | 0.3832        | 0.405        | 0.1251        |
|           | Mississippi    | <b>0.710</b> | <b>0.0022</b> | <b>0.712</b> | <b>0.0128</b> | <b>0.576</b> | <b>0.0109</b> | <b>0.582</b> | <b>0.0471</b> |
|           | Missouri       | 0.062        | 0.4585        | 0.285        | 0.2617        | 0.074        | 0.4192        | 0.095        | 0.6694        |
|           | North Carolina | 0.135        | 0.2968        | 0.254        | 0.3593        | 0.038        | 0.5866        | 0.041        | 0.8642        |
|           | Oklahoma       | 0.223        | 0.1428        | 0.231        | 0.3488        | 0.026        | 0.6324        | 0.296        | 0.2449        |
|           | South Carolina | 0.052        | 0.5001        | 0.140        | 0.5466        | 0.193        | 0.1769        | 0.206        | 0.3971        |
|           | Tennessee      | <b>0.603</b> | <b>0.0083</b> | <b>0.722</b> | <b>0.0113</b> | 0.189        | 0.1814        | 0.406        | 0.1245        |
|           | Texas          | 0.006        | 0.8140        | 0.368        | 0.1600        | 0.064        | 0.4534        | 0.350        | 0.1785        |
| Virginia  | 0.021          | 0.6684       | 0.462         | 0.0836       | 0.081         | 0.3938       | 0.154         | 0.5133       |               |

438  
 439 **Relationship between soybean production/yield and fungicide use over time.** Table 6 presents  
 440 coefficient of variation ( $R^2$ ) and corresponding *P*-values from linear and quadratic regression

441 analyses for foliar fungicide use and soybean production/yield for soybean growing states in the  
442 United States from 2005 to 2015. Except for 2007, a significant quadratic relationship was  
443 observed between total soybean production (1,000 MT) and total foliar fungicide use (MT) for all  
444 other years (2005:  $y = 2.271x^2 + 27.2x + 906.5$ ; 2006:  $y = 0.381x^2 + 127.3x + 672$ ; 2008:  $y =$   
445  $0.199x^2 + 85.4x + 251.1$ ; 2009:  $y = -0.597x^2 + 125.6x + 255.1$ ; 2010:  $y = 0.594x^2 + 63.9x + 828$ ;  
446 2011:  $y = 0.489x^2 + 20.8x + 800$ ; 2012:  $y = -0.731x^2 + 139.1x - 906.5$ ; 2013:  $y = -0.129x^2 +$   
447  $97.3x - 635$ ; 2014:  $y = -0.298x^2 + 109.1x - 255.2$ ; 2015:  $y = -0.301x^2 + 98x + 126.6$ ). When  
448 soybean yield (kg) and foliar fungicide use (g) were considered on a per hectare basis, a significant  
449 quadratic relationship was only observed for 2005 ( $y = 0.037x^2 - 13.8x + 2,826.2$ ), 2007 ( $y =$   
450  $0.006x^2 - 4.9x + 2,608$ ), 2010 ( $y = 0.038x^2 - 15.2x + 2,991.5$ ), and 2011 ( $y = -0.059x^2 + 1.6x +$   
451  $2,583.4$ ).

452

453 **Table 6.** Coefficient of determination ( $R^2$ ) and corresponding  $P$ -values from linear and second  
454 order polynomial (quadratic) regression analyses for the relationship between foliar fungicide use  
455 and soybean production/yield from soybean growing states in the United States during 2005 to  
456 2015 period ( $\alpha = 0.05$ ). A = relationship between total fungicide use (MT) and total soybean  
457 production (1,000 MT) per state basis. B = relationship between total fungicide use (g/ha) and  
458 yield (kg/ha) per state basis. Bold values indicate significant  $P$ -values and associated  $R^2$  values.

459

| Year | A              |                   |                |                   | B              |               |                |               |
|------|----------------|-------------------|----------------|-------------------|----------------|---------------|----------------|---------------|
|      | Linear         |                   | Quadratic      |                   | Linear         |               | Quadratic      |               |
|      | R <sup>2</sup> | <i>P</i>          | R <sup>2</sup> | <i>P</i>          | R <sup>2</sup> | <i>P</i>      | R <sup>2</sup> | <i>P</i>      |
| 2005 | <b>0.518</b>   | <b>&lt;0.0001</b> | <b>0.564</b>   | <b>&lt;0.0001</b> | <b>0.276</b>   | <b>0.0041</b> | <b>0.371</b>   | <b>0.0030</b> |
| 2006 | <b>0.407</b>   | <b>0.0003</b>     | <b>0.408</b>   | <b>0.0014</b>     | 0.093          | 0.1155        | 0.128          | 0.1798        |
| 2007 | 0.004          | 0.7410            | 0.028          | 0.6966            | <b>0.275</b>   | <b>0.0042</b> | <b>0.375</b>   | <b>0.0028</b> |
| 2008 | <b>0.474</b>   | <b>&lt;0.0001</b> | <b>0.476</b>   | <b>0.0003</b>     | 0.108          | 0.0879        | 0.127          | 0.1819        |
| 2009 | <b>0.355</b>   | <b>0.0010</b>     | <b>0.512</b>   | <b>0.0002</b>     | 0.048          | 0.2604        | 0.103          | 0.2570        |
| 2010 | <b>0.404</b>   | <b>0.0003</b>     | <b>0.409</b>   | <b>0.0014</b>     | <b>0.399</b>   | <b>0.0003</b> | <b>0.407</b>   | <b>0.0015</b> |
| 2011 | <b>0.634</b>   | <b>&lt;0.0001</b> | <b>0.669</b>   | <b>&lt;0.0001</b> | <b>0.233</b>   | <b>0.0093</b> | <b>0.258</b>   | <b>0.0239</b> |
| 2012 | <b>0.578</b>   | <b>&lt;0.0001</b> | <b>0.585</b>   | <b>&lt;0.0001</b> | 0.021          | 0.4670        | 0.046          | 0.5554        |
| 2013 | <b>0.740</b>   | <b>&lt;0.0001</b> | <b>0.745</b>   | <b>&lt;0.0001</b> | 0.035          | 0.3370        | 0.049          | 0.5317        |
| 2014 | <b>0.196</b>   | <b>0.0182</b>     | <b>0.583</b>   | <b>&lt;0.0001</b> | 0.077          | 0.1518        | 0.128          | 0.1797        |
| 2015 | 0.103          | 0.0954            | <b>0.440</b>   | <b>0.0007</b>     | 0.018          | 0.4948        | 0.185          | 0.0780        |

**Factor analysis with mixed data (FAMD).** When FAMD was performed for foliar fungicide use, the variance maximizing data point (a data point = total fungicide use in a particular year for a given state) distribution in the factor map did not show a clear clustering pattern based upon state, year, and yield zone. However, a clear clustering was observed based upon region, harvest zone, and production zone (Fig. 6). Factor maps for both harvest and production zones showed that harvest/production zone 1 distantly clusters from harvest/production zone 4 while harvest/production zones 1 and 2 clustered in close proximity in the factor map.

**Analysis of variance (ANOVA).** ANOVA showed significant main effect of yield zone ( $P = 0.0003$ ), harvest zone ( $P < 0.0001$ ), and production zone ( $P < 0.0001$ ) on foliar fungicide use. With respect to yield zone, the foliar fungicide use (g/ha) in yield zone 1 was significantly greater than that of yield zones 2, 3, and 4 (Fig. 7). In case of harvest zone, the foliar fungicide use in zones 1 and 2 were significantly greater compared to those of zones 3 and 4. Foliar fungicide use in harvest zone 3 was significantly greater than that of zone 4. Trends observed for production zone were same as with harvest zone.

483 **DISCUSSION**

484

485 The current paper seeks to understand the patterns of foliar fungicide use and its relationship with  
486 soybean yield losses due to fungal pathogens (targets of fungicides considered in the study) at  
487 broader geographic (national/regional/state) and temporal scales. The trends that we see at such  
488 scales may or may not necessarily reflect/represent what each individual soybean farmer would  
489 have experienced at a farm scale. For example, the lack of a strongly negative relationship between  
490 yield losses and fungicide use at the state level does not necessarily mean that all soybean farmers  
491 within that particular state did not experience a negative relationship between fungicide use and  
492 soybean yield losses at their individual farm level. In other words, with the results we present here,  
493 we cannot simply extrapolate the individual farmer experience in relation to his fungicide use and  
494 yield losses profiles. As such, this paper does not necessarily seek to facilitate the fungicide  
495 application decision making at the individual farm level, rather trying to provide some insights on  
496 fungicide use patterns and their degree of utility in terms of reducing foliar disease associated yield  
497 losses at a broader geographic scale.

498

499 Use of foliar fungicides has been a major strategy to manage fungal pathogens in agricultural  
500 cropping systems following the green revolution. Fungicide usage has increased over the past  
501 decade especially in soybean production systems. Findings of the current study revealed that the  
502 foliar fungicide usage in the U.S. increased by 116% (on a per unit area basis: g/ha) and 260% (on  
503 a total usage basis: MT) from 2005 to 2015. Fungicide use was greatest in 2007, which was a year  
504 with more widespread soybean rust outbreaks on a national level and the first year that soybean  
505 rust moved into the upper Midwest through Texas to Iowa [36]. Furthermore, 2007 was the only



506 year to date that Iowa reported observing the disease [36]. A similar situation occurred in 2009,  
507 where an increased incidence of soybean rust was reported. For example, Alabama, Georgia,  
508 Mississippi, and Tennessee reported the greatest number of counties with soybean rust [36].  
509 Moreover, on a national basis, more counties/parishes were observed to contain soybean rust  
510 during 2009 than any other year [36]. Additionally, 2009 was an exceptionally wet year  
511 particularly in the southern U.S., leading to more foliar diseases [36]. All these factors could have  
512 specifically contributed to the greater foliar fungicide use in 2009.

513

514 The regional level data revealed that foliar fungicide use (total in MT as well and per hectare basis  
515 in g) was greater in the southern states compared to the northern states despite the greater land use  
516 for soybean production in the northern states. The greater per hectare fungicide use in the south  
517 may be due to several reasons. In general, this region has an extended period of soybean planting  
518 (March to June) and a prolonged period of disease conducive conditions (warmer and wetter for a  
519 longer period of time) compared to the northern U.S. Along with that, soybean rust was first  
520 detected in the contiguous U.S. in November 2004 [37] and fungicides were the main method of  
521 managing the disease. Even though soybean rust has not posed a major yield loss threat since the  
522 initial observation [38], fungicide applications in specific years have likely been driven by the  
523 presence of the disease. Lastly, based on observations by Extension specialists, a greater  
524 percentage (60-65 %) of southern U.S. acres likely receives at least one fungicide application at a  
525 specific growth stage as an automatic application in the absence of diseases.

526

527 The significant quadratic relationship observed at the national level between total yield losses (in  
528 1,000 MT) due to foliar diseases and total foliar fungicide use (MT) indicated that losses initially

529 increased at a decreasing rate, reached a plateau, and eventually decreased at an increasing rate  
530 with increasing use of fungicide. This was observed in both northern and southern states for the  
531 relationship between total yield losses due to foliar diseases and total foliar fungicide use. The  
532 positive relationship observed between yield losses and fungicide use in the initial phase of the  
533 curve (at both national and regional levels) could occur as a result of the poor application timing  
534 practices of fungicide with the intention of saving the crop under severe disease pressure,  
535 particularly after passing the economic injury level. The application timing greatly affects the  
536 effectiveness of a fungicide in terms of its ability to suppress the severity of a disease and  
537 associated yield losses [19, 26, 39, 40]. For instance, applying a suitable fungicide after the  
538 establishment of a disease for diseases that include frogeye leaf spot [39] and soybean rust [41]  
539 could still result in significant yield losses.

540

541 Prophylactic application of foliar fungicides can significantly increase production costs, and  
542 subsequently suppress profitability particularly when diseases are absent or are present at low  
543 levels [42]. In the current study, we observed that the vast majority of the states have used a greater  
544 amount of preventive fungicides as compared to curative fungicide at the temporal scale. If the  
545 application of a preventive fungicide was not made at the suggested growth stage based on plant  
546 phenology, such applications may not provide a scenario whereby a reduction in the potential yield  
547 losses associated with a given disease were met. Poor fungicide application practices may  
548 contribute to a positive relationship between fungicide use and yield losses.

549

550 Additionally, reduced fungicide efficiency due to a variety of factors such as unfavorable  
551 environmental conditions and automatic fungicide application on disease-resistant soybean  
552 cultivars can result in a positive relationship between fungicide use and yield losses. For example,

553 compared to the control, application of benomyl at different application timings based on growth  
554 stage did not significantly reduce frogeye leaf spot severity or associated grain yield loss on  
555 resistant soybean genotypes, although significant disease severity and yield loss reductions were  
556 observed with susceptible soybean genotypes [39]. Resistance within the targeted pathogen  
557 population to the active ingredient contained in the applied fungicide/s could also contribute to a  
558 positive relationship between fungicide use and yield losses [28, 29, 31-33]. Furthermore,  
559 fungicides are applied with self-propelled, pull type, or aerial spray applicators in the U.S. Ground  
560 applicators create wheel-tracks in the soybean crop, which reduce yield particularly when made  
561 during the reproductive growth stages [43]. This also can contribute to positive correlation between  
562 fungicide use and soybean yield losses.

563

564 When yield losses and fungicide use were considered on a per hectare basis at both the national  
565 and regional levels, the relationships were non-significant, with the exception of the significant  
566 quadratic relationship between per hectare fungicide use and losses due to foliar diseases in the  
567 northern states. The non-significant relationships could partly be due to the application of  
568 fungicide in the absence of disease, under low disease pressure or when applied to a disease-  
569 resistant cultivar. In fact, several experimental studies regarding the prophylactic application of  
570 foliar fungicides in the absence of disease revealed non-significantly different yield between  
571 treated and non-treated situations [20-22]. These results suggest that the application of foliar  
572 fungicides may be more beneficial in the presence of disease or situations where there is a high  
573 probability of disease occurrence. For instance, experimental data revealed that farmers in the  
574 north central region do not often need fungicide applications to manage foliar diseases [23].  
575 However, in many cases, increasing the number of inputs including a fungicide application has

576 become part of a farmer's soybean management system in their search for maximizing yield and  
577 subsequent profitability [42].

578

579 Analyses conducted at the state level showed no significant linear or quadratic relationship  
580 between soybean production/yield losses and foliar fungicide use for a vast majority of the states.

581 Although a significant linear relationship between total yield losses (in 1,000 MT) due to foliar  
582 diseases and total foliar fungicide use (MT) was observed for Florida, Indiana, Kentucky, and

583 Pennsylvania, the relationship was positive. Similarly, although the quadratic relationship between  
584 the two variables were significant for Louisiana and Missouri, the direction of the relationship was

585 positive. Furthermore, when the losses and fungicide use were considered on a per hectare basis,  
586 a significant quadratic relationship was evident between them for Louisiana and Missouri.

587 However, the direction of the relationship was positive. Therefore, at the state level, our findings  
588 do not provide strong statistical evidence to support the usefulness of foliar fungicide application

589 to mitigate foliar disease-associated soybean yield losses. Nevertheless, a significant quadratic  
590 relationship was observed between total soybean production and total foliar fungicide use (MT)

591 for Alabama, Arkansas, Florida, Georgia, Kentucky, Louisiana, Mississippi, North Dakota,  
592 Pennsylvania, and Tennessee. Quadratic curves for each of these states showed that increased

593 fungicide use contributed to increased yield, although this reached a plateau where additional  
594 fungicide did not add additional yield. These relationships showed that there may be some benefit

595 for fungicide use in soybean production systems.

596

597 Results from the factor analysis with mixed data (FAMD) showed clear distinction between  
598 yield/harvest/production zone 1 and 4 based on foliar fungicide use, suggesting contrasting

599 fungicide use differences between these zones. The current observation was further confirmed by  
600 ANOVA results where mean use in zone 1 was significantly greater compared to zone 4. In  
601 general, results showed that the mean per hectare foliar fungicide use was significantly greater in  
602 low yield/harvest/production zones while the use was lower in high yield/harvest/production  
603 zones. However, it may be possible that soybean farmers in low yield/harvest/production zones  
604 tend to apply foliar fungicides based on a perceived yield benefit as the result of an application  
605 made at a specific growth stage, rather than based upon disease observations or soybean cultivar  
606 disease tolerance. In fact, previous studies suggested that yield increases can occur following foliar  
607 fungicide application irrespective of the presence/absence of diseases [7, 15, 23-25, 44-46]. The  
608 yield response in the absence of disease has been partly attributed to the physiological changes  
609 that have been reported to occur in the plants following fungicide application with certain  
610 chemistries [14]. Increased yield in response to some fungicides such as QoIs have been observed  
611 even in the absence of foliar diseases due to their non-fungicidal physiological changes in, for  
612 example, soybean [22, 47, 48], wheat, and barley [49-51]. Some of these plant physiological  
613 changes include increased leaf greenness, chlorophyll content, photosynthetic rates, and water use  
614 efficiency, as well as delayed senescence [44, 46, 49, 50, 52]. Previous studies also reported that  
615 foliar application of pyraclostrobin enhance the growth, nitrogen assimilation, and yield of  
616 soybean [53] and wheat [54, 55]. Therefore, as revealed by the current study, it appeared that the  
617 farmers in the historically low yield/harvest/production zones tend to use foliar fungicide  
618 applications with the expectation of a yield increase.

619

620 In the current study, it was not possible to determine the relationship between yield losses caused  
621 by a single disease and the amount of a labeled fungicide used to control that disease. This was

622 because each fungicide considered in this study may effectively control more than one disease. For  
623 instance, QoI fungicides can be used to manage anthracnose (*Colletotrichum truncatum*),  
624 Cercospora leaf blight (*Cercospora kikuchii*), frog-eye leaf spot; pod and stem blight (*Diaporthe*  
625 *phaseolorum*); Rhizoctonia aerial blight (*Rhizoctonia solani*), and Septoria brown spot [6, 7, 56,  
626 57]. Based on the manner in which the information in the fungicide use database is provided, there  
627 is no way to tell what the fungicide specifically targeted. Therefore, relationships between total  
628 yield losses caused by all foliar diseases and total concentration of foliar fungicide used were  
629 considered for this study.

630

631 Although we have previously estimated soybean yield losses due to various diseases for the period  
632 between 1996 and 2015 [58], the corresponding annual state-level foliar fungicide use estimates  
633 were not available for the entire period in the Pesticide National Synthesis Project database  
634 ([https://water.usgs.gov/nawqa/pnsp/usage/maps/county-level/StateLevel/HighEstimate\\_AgPestU](https://water.usgs.gov/nawqa/pnsp/usage/maps/county-level/StateLevel/HighEstimate_AgPestUsebyCropGroup92to16.txt)  
635 [sebyCropGroup92to16.txt](https://water.usgs.gov/nawqa/pnsp/usage/maps/county-level/StateLevel/HighEstimate_AgPestUsebyCropGroup92to16.txt)). Therefore, the foliar fungicides used between 2005 and 2015 were  
636 considered for the current study. With the data used for this study, it was not possible to conduct  
637 a realistic economic analysis to determine whether fungicide application was cost effective. Unless  
638 there is an appropriate control for comparison, one could not determine the economic yield savings  
639 as a result of fungicides applied. Moreover, it is likely that the physical yield losses could have  
640 potentially been greater if fungicides were not applied. In addition, the fungicide database only  
641 contains information regarding the use of active ingredients and does not include such information  
642 as to whether or not a particular active ingredient was applied as a stand-alone fungicide product  
643 or in the form of a pre-mixture of more than one chemical. Based on the commercial product and  
644 company, the same active ingredient can be marketed under several different trade names and in

645 some cases the products can be priced differently depending on retail outfit. Annual fluctuations  
646 as well as locational variations in fungicide application cost (i.e., aerial application versus ground  
647 application) and soybean commodity price also are contributing factors as to why a comprehensive  
648 economic analysis is less realistic.

649

650 In summary, we did not observe a strongly negative relationship between foliar fungicide use (g)  
651 and yield losses (Kg) per unit area (ha) at national, regional, and state levels. However, the  
652 observed positive impact of foliar fungicide use on total soybean production (1,000 MT) and yield  
653 (kg/ha) at national, regional, and state levels indicated the possible benefit of foliar fungicide  
654 application to produce greater soybean yield. Nevertheless, we cannot simply extrapolate the  
655 individual farmer experience in relation to his/her fungicide use and foliar disease associated yield  
656 losses (and total soybean production too) based on the trends that we observed in this paper at a  
657 broader spatial scale (national/regional/state). As such, the specific content of this paper may not  
658 be strictly useful to facilitate the fungicide application decision making at individual farm level.  
659 However, we suggest that farmers should not rely on fungicides as the sole management strategy  
660 to manage foliar diseases in soybean. Instead, location specific best management practices such as  
661 optimum maturity group, planting date, seeding rate, row spacing, crop rotation, fertilizer, field  
662 history as it relates to disease incidence, and irrigation regime as well as use of genetic resistance  
663 should be emphasized to decrease the probability of disease incidence. When necessary, farmers  
664 should make informed decisions as to the use of foliar fungicides with special emphasis on  
665 application timing (disease susceptible plant growth stage). In conclusion, rather than using  
666 fungicides as a routine practice, farmers should treat foliar fungicides as an integral component of  
667 a sound integrated pest management system.

668

669

670 **ACKNOWLEDGEMENTS**

671

672 We thank the United Soybean Board for support of the soybean yield losses estimates. This project  
673 was also supported by the USDA National Institute of Food and Federal Appropriations under  
674 Project PEN04660 and Accession number 1016474. We also would like to express our thanks and  
675 gratitude to all Extension plant pathologist and soybean disease experts who contributed  
676 observations on soybean losses in their respective states over the years.

677

678

679 **REFERENCES**

680

- 681 1. Lal R. Soil degradation as a reason for inadequate human nutrition. *Food Secur.* 2009; 1:45-  
682 57
- 683 2. Strange RN, Scott PR. Plant disease: A threat to global food security. *Annu. Rev. Phytopathol.*  
684 2005; 43:83-116.
- 685 3. Hartman GL, Rupe JC, Sikora EJ, Domier LL, Davis JA, Steffey KL. *Compendium of Soybean*  
686 *Diseases and Pests.* 5th ed. American Phytopathological Society Press, St. Paul, MN; 2015.
- 687 4. Allen TW, Bradley CA, Sisson AJ, Byamukama E, Chilvers MI, Coker CM, et al. Soybean  
688 yield loss estimates due to diseases in the United States and Ontario, Canada from 2010 to  
689 2014. *Plant Health Prog.* 2017; 18:19-27.



- 690 5. Wrather JA, Koenning SR. Effects of diseases on soybean yields in the United States 1996 to  
691 2007. *Plant Health Prog.* 2009; doi:10.1094/PHP-2009-0401-01-RS.
- 692 6. Cruz CD, Mills D, Paul PA, Dorrance AE. Impact of brown spot caused by *Septoria glycines*  
693 on soybean in Ohio. *Plant Dis.* 2010; 94:820-826.
- 694 7. Dorrance AE, Cruz C, Mills D, Bender R, Koenig M, LaBarge G, et al. Effects of foliar  
695 fungicide and insecticide applications on soybean in Ohio. *Plant Health Prog.* 2010; 11:1-7.
- 696 8. Wise KA, Newman ME. Frogeye leaf spot. In: Hartman GL, Rupe JC, Sikora EJ, Domier LL,  
697 Davis JA, Steffey KL (Eds.), *Compendium of Soybean Diseases and Pests*. American  
698 Phytopathological Society, St. Paul MN; 2015, pp 43-45.
- 699 9. Wrather JA, Porta-Puglia A, Ram HH, Yorinori JT, Ploper LD, Anderson TR, et al. Soybean  
700 disease loss estimates for the top ten soybean producing countries in 1998. *Can. J. Plant Pathol.*  
701 2001; 23:115-121.
- 702 10. Cooper RL. Soybean yield response to benomyl fungicide application under maximum yield  
703 conditions. *Agron. J.* 1989; 81:847-849.
- 704 11. Mian MAR, Phillips DV, Boerma HR, Missaoui AM, Walker DR. Frogeye leaf spot of  
705 soybean: A review and proposed race designations for isolates of *Cercospora sojina* Hara. *Crop*  
706 *Sci.* 2008; 48:14-24.
- 707 12. Dashiell KE, Akem CN. Yield losses in soybeans from frogeye leaf spot caused by *Cercospora*  
708 *sojina*. *Crop Prot.* 1991; 10:465-468.
- 709 13. Mueller DS, Wise KA, Dufault NS, Bradley CA, Chilvers MA (Eds.), *Fungicides for Field*  
710 *Crops*. American Phytopathological Society Press, St. Paul, MN; 2013.
- 711 14. Mahoney KJ, Vyn RJ, Gillard CL. The effect of pyraclostrobin on soybean plant health, yield,  
712 and profitability in Ontario. *Can. J. Plant Sci.* 2015; 95:285-292.

- 713 15. Bartlett DW, Clough JM, Godwin JR, Hall AA, Hamer M, Parr-Dobrzanski B. The strobilurin  
714 fungicides. *Pest. Manag. Sci.* 2002; 58:649-662.
- 715 16. FRAC. Fungicide Resistance Action Committee Code List 2016. Fungicides sorted by mode  
716 of action. <http://www.frac.info/publications>; 2016.
- 717 17. Wise KA. Diseases of soybeans: Fungicide efficacy for control of soybean foliar diseases.  
718 *Purdue Ext. Bull. SPS-103-W. BP-161-W*; 2016.
- 719 18. Galloway J. Effective management of soybean rust and frogeye leaf spot using a mixture of  
720 flusilazole and carbendazim. *Crop Prot.* 2008; 27:566-571.
- 721 19. Mueller TA, Miles MR, Morel W, Marois JJ, Wright DL, Kemerait, RC, et al. Effect of  
722 fungicide and timing of application on soybean rust severity and yield. *Plant Dis.* 2009; 93:243-  
723 248.
- 724 20. Bradley KW, Sweets LE. Influence of glyphosate and fungicide co-applications on weed  
725 control, spray penetration, soybean response, and yield in glyphosate-resistant soybean. *Agron.*  
726 *J.* 2008; 100:1360-1365.
- 727 21. Hershman D, Johnson D, Herbek J. Quadris and Warrior use on soybean: A means of capturing  
728 additional yield? *Kentucky Pest Newsletter*, University of Kentucky, Lexington; 2004.
- 729 22. Swoboda C, Pedersen P. Effect of fungicide on soybean growth and yield. *Agron. J.* 2009;  
730 101:352-356.
- 731 23. Kandel YR, Mueller DS, Hart CE, Bestor NR, Bradley CA, Ames KA, et al. Analyses of yield  
732 and economic response from foliar fungicide and insecticide applications to soybean in the  
733 North Central United States. *Plant Health Prog.* 2016; 17:232-238.

- 734 24. Klingelfuss LH, Yorinori JT, Ferreira LP, Pereira JE. Timing of fungicide sprays for the  
735 control of late season diseases of soybean, *Glycine max* (L.) Merrill. Acta Sci. 2001; 23:1287-  
736 1292.
- 737 25. Mourtzinis S, Marburger D, Gaska J, Diallo T, Lauer JG, Conley S. Corn, soybean, and wheat  
738 yield response to crop rotation, nitrogen rates, and foliar fungicide application. Crop Sci. 2017;  
739 57:983-992.
- 740 26. Hanna SO, Conley SP, Shaner GE, Santini JB. Fungicide application timing and row spacing  
741 effect on soybean canopy penetration and grain yield. Agron. J. 2008; 100:1488-1492.
- 742 27. Yorinori MA, Klingelfuss LH, Paccola-Meirelles LD, Yorinori JT. Effect of time of spraying  
743 of fungicide and foliar nutrient on soybean powdery mildew. J. Phytopath. 2004; 152:129-132.
- 744 28. Price III PP, Purvis MA, Cai G, Padgett GB, Robertson CL, Schneider RW, et al. Fungicide  
745 resistance in *Cercospora kikuchii*, a soybean pathogen. Plant Dis. 2015; 99:1596-1603.
- 746 29. Standish JR, Tomaso-Peterson M, Allen TW, Sabanadzovic S, Aboughanem-Sabanadzovic N.  
747 Occurrence of QoI fungicide resistance in *Cercospora sojina* from Mississippi soybean. Plant  
748 Dis. 2015; 99:1347-1352.
- 749 30. Zeng F, Arnao E, Zhang G, Olaya G, Wullschleger J, Sierotzki H, et al. Characterization of  
750 quinone outside inhibitor fungicide resistance in *Cercospora sojina* and development of  
751 diagnostic tools for its identification. Plant Dis. 2015; 99:544-550.
- 752 31. Zhang G, Allen TW, Bond JP, Fakhoury AM, Dorrance AE, Weber L, et al. Widespread  
753 occurrence of quinone outside inhibitor fungicide-resistant isolates of *Cercospora sojina*,  
754 causal agent of frogeye leaf spot of soybean, in the United States. Plant Health Prog. 2018:  
755 19:295-302.

- 756 32. Zhang GR, Newman MA, Bradley CA. First report of the soybean frogeye leaf spot fungus  
757 (*Cercospora sojina*) resistant to quinone outside inhibitor fungicides in North America. Plant  
758 Dis. 2012; 96:767.
- 759 33. Mathew FM, Byamukama E, Neves DL, Bradley CA. Resistance to quinone outside inhibitor  
760 fungicides conferred by the G143A mutation in *Cercospora sojina* (causal agent of frogeye leaf  
761 spot) isolates from South Dakota soybean fields. Plant Health Prog. 2019; 20:104-105.
- 762 34. Padwick GW. Losses caused by Plant Diseases in the Tropics. Commonwealth Mycological  
763 Inst. Kew, Surrey, Phytopath. Papers No.1; 1956.
- 764 35. Pagès J. Analyse factorielle de donnees mixtes. Rev. Stat. Appl. 2004; 4:93-111.
- 765 36. Allen T, Hollier C, Sikora E. A continuing saga: Soybean rust in the continental United States,  
766 2004 to 2013. Outlooks on Pest Management, 2014; 25:167-174.
- 767 37. Schneider RW, Hollier CA, Whitam HK, Palm ME, McKemy, J.M., Hernandez, et al. First  
768 report of soybean rust caused by *Phakopsora pachyrhizi* in the continental United States. Plant  
769 dis. 2005; 89:774-774.
- 770 38. Sikora EJ, Allen TW, Wise KA, Bergstrom G, Bradley CA, Bond J, et al. A coordinated effort  
771 to manage soybean rust in North America: A success story in soybean disease monitoring.  
772 Plant Dis. 98: 2014; 864-875.
- 773 39. Akem CN. The effect of timing of fungicide applications on control of frogeye leaf spot and  
774 grain yield of soybeans. Eur. J. Plant Pathol. 1995; 101:183-187.
- 775 40. Ward JMJ, Laing MD, Rijkenberg FHJ. Frequency and timing of fungicide for the control of  
776 gray leaf spot in maize. Plant Dis. 1997; 81:41-48.
- 777 41. Miles MR, Levy C, Morel W, Mueller T, Steinlage T, Van-Rij N, et al. International fungicide  
778 efficacy trials for the management of soybean rust. Plant Dis. 2007; 91:1450-1458.

- 779 42. Orlowski JM, Haverkamp BJ, Laurenz RG, Marburger D, Wilson EW, Casteel SN, et al. High-  
780 input management systems effect on soybean seed yield, yield components, and economic  
781 break-even probabilities. *Crop Sci.* 2016; 56:1988-2004.
- 782 43. Piper EL, Swearingin ML, Nyquist WE. Postemergence wheel-traffic effects on plant  
783 population and yield in solid-seeded soybean. *J. Prod. Agric.* 1989; 2:251-256.
- 784 44. Bryson RJ, Leandro L, Jones DR. The physiological effects of kresoxim-methyl on wheat leaf  
785 greenness and the implications for crop yield. In: *The Proceedings of the BCPC Conference,*  
786 *Brighton, UK. 13-16 Nov. British Crop Production Council, Hampshire, UK; 2000, pp 739-*  
787 *749*
- 788 45. Nelson KA, Meinhardt CG. Foliar boron and pyraclostrobin effects on corn. *Agron. J.* 2011;  
789 103, 1352-1358.
- 790 46. Venancio WS, Rodrigues MAT, Begliomini E, de Souza NL. Physiological effects of the  
791 strobilurin fungicides on plants. *Publ. UEPG Ci. Exatas Terra, Ci. Agr.* 2003; Eng.9:59-68.
- 792 47. Fagan EB, Neto DD, Vivian R, Franco RB, Yeda MP, Massignam LF, et al. Effect of  
793 pyraclostrobin application on the photosynthesis rate, respiration, nitrate reductase activity and  
794 productivity of soybean crop. *Bragantia.* 2010; 69:771-777.
- 795 48. Begliomini E, Rodrigues MAT, Leduc EL, Neto DD. Physiological effects of the F500  
796 (pyraclostrobin) application in the soybean crop. In: *Proceedings of the National Soybean Rust*  
797 *Symposium, Louisville, Kentucky, USA 12-14 Dec; 2007.*
- 798 49. Grossmann K, Retzlaff G. Bioregulatory effects of the fungicidal strobilurin kresoximmethyl  
799 in wheat (*Triticum aestivum*). *Pestic. Sci.* 1997; 50:11-20.

- 800 50. Grossmann K, Kwaltowski J, Caspar G. Regulation of phytohormone levels, leaf senescence  
801 and transpiration by the strobilurin kresoximmethyl in wheat (*Triticum aestivum*). J. Plant  
802 Physiol. 1999; 154:805-808.
- 803 51. Bayles RA, Hilton GJ. Variety as a factor in the response of cereals to strobilurins. In: The  
804 Proceedings of the BCPC Conference, Brighton, UK. 13-16 Nov. British Crop Production  
805 Council, Hampshire, UK; 2000, pp 731-738.
- 806 52. Koehle H, Grossmann K, Jabs T, Stierl R, Gerhard M, Kaiser W, et L. Physiological effects of  
807 the strobilurin fungicide F 500 on plants. In: Lyr H, Russell PE, Dehne HW, Sisler HD (Eds.),  
808 Modern Fungicides and Antifungal Compounds III. Intercept, Andover, UK; 2002, pp 61-74.
- 809 53. Joshi J, Sharma S, Guruprasad KN. Foliar application of pyraclostrobin fungicide enhances the  
810 growth, rhizobial-nodule formation and nitrogenase activity in soybean (var. JS-335). Pest.  
811 Biochem. Physiol. 2014; 114:61-66.
- 812 54. Ruske RE, Gooding MJ, Jones SA. The effects of triazole and strobilurin fungicide programs  
813 on nitrogen uptake, partitioning, remobilization and grain N accumulation in winter wheat  
814 cultivars. J. Agric. Sci. 2003; 140:395-407.
- 815 55. Butkute B, Mankeviciene A, Gaurilcikiene I. A comparative study of strobilurin and triazole  
816 treatments in relation to the incidence of Fusarium head blight in winter wheat, grain quality  
817 and safety. Cereal Res. Commun. 2008; 36:671-675.
- 818 56. BASF. Headline. Available at <https://agriculture.basf.com/us/en/Crop-Protection.html>. BASF,  
819 Research Triangle Park, NC; 2009.
- 820 57. Syngenta. Quadris. Available at <http://www.syngenta-us.com/fungicides/quadris>. Syngenta  
821 Crop Protection, Greensboro, NC; 2009.

822 58. Bandara AY, Weerasooriya DK, Bradley CA, Allen TW, Esker PD.  
823 doi:<https://doi.org/10.1101/655837>

824

825

826 **Figure Legends.**

827

828 **Fig 1.** Spatiotemporal foliar fungicide use patterns in the United States. Temporal fluctuation for  
829 foliar fungicide use during 2005 to 2015 across all states considered (A) and state-wide use of  
830 cumulative foliar fungicides from 2005 to 2015 (B). Fungicides included: quinone outside  
831 inhibitors = azoxystrobin, fluoxastrobin, picoxystrobin, pyraclostrobin, trifloxystrobin;  
832 demethylation inhibitors = cyproconazole, difenoconazole, flutriafol, propiconazole,  
833 prothioconazole, tebuconazole, tetraconazole; methyl benzimidazole carbamates = thiophanate-  
834 methyl; multi-site mode of action = chlorothalonil; and succinate dehydrogenase inhibitors =  
835 fluxapyroxad.

836

837 **Fig 2.** Total foliar fungicide use (from 2005 to 2015) by region. Northern states = IL, IN, IA, KS,  
838 MI, MN, NE, ND, OH, PA, SD, and WI; Southern states = AL, AR, DE, FL, GA, KY, LA, MD,  
839 MO, MS, NC, OK, SC, TN, TX, and VA. Fungicides included: quinone outside inhibitors =  
840 azoxystrobin, fluoxastrobin, picoxystrobin, pyraclostrobin, trifloxystrobin; demethylation  
841 inhibitors = cyproconazole, difenoconazole, flutriafol, propiconazole, prothioconazole,  
842 tebuconazole, tetraconazole; methyl benzimidazole carbamates = thiophanate-methyl; multi-site  
843 mode of action = chlorothalonil; and succinate dehydrogenase inhibitors = fluxapyroxad.

844

845 **Fig 3.** Temporal fluctuation (A) and state-wide variation (B) in the amount of preventive and  
846 curative foliar fungicide application use in the United States. Preventive fungicides = quinone  
847 outside inhibitors (QoIs) =  $\sum$  azoxystrobin, fluoxastrobin, picoxystrobin, pyraclostrobin, and  
848 trifloxystrobin. Curative fungicides = demethylation inhibitors (DMIs) =  $\sum$  cyproconazole,  
849 difenoconazole, flutriafol, propiconazole, prothioconazole, tebuconazole, and tetraconazole.

850

851 **Fig 4.** Scatter plots presenting the national scale linear/quadratic relationship between (A) total  
852 soybean yield losses due to foliar diseases (1,000 MT) and total foliar fungicide use (MT), (B) per  
853 hectare total soybean yield losses due to foliar diseases (in kg) and per hectare total foliar fungicide  
854 use (g), and regional scale quadratic relationship between (C) total soybean yield losses due to  
855 foliar diseases (1,000 MT) and foliar fungicide use (MT), and (D) per hectare total soybean yield  
856 losses due to foliar diseases (in kg) and per hectare total foliar fungicide use (g). Each data point  
857 represents a state in a given year. All figures contain data during 2005 to 2015 from 28 soybean  
858 growing states including AL, AR, DE, FL, GA, IA, IL, IN, KS, KY, LA, MD, MI, MN, MO, MS,  
859 NC, ND, NE, OH, OK, PA, SC, SD, TN, TX, VA, and WI. Foliar diseases include anthracnose,  
860 *Cercospora* leaf blight (purple seed stain), frog-eye leaf spot, *Rhizoctonia* aerial blight, *Sclerotinia*  
861 stem rot (White mold), *Septoria* brown spot, and soybean rust. Fungicides included: quinone  
862 outside inhibitors = azoxystrobin, fluoxastrobin, picoxystrobin, pyraclostrobin, trifloxystrobin;  
863 demethylation inhibitors = cyproconazole, difenoconazole, flutriafol, propiconazole,  
864 prothioconazole, tebuconazole, tetraconazole; methyl benzimidazole carbamates = thiophanate-  
865 methyl; multi-site mode of action = chlorothalonil; and succinate dehydrogenase inhibitors =  
866 fluxapyroxad.

867



868 **Fig 5.** Scatter plots presenting the national scale linear/quadratic relationship between (A) total  
869 soybean production (1,000 MT) and total foliar fungicide use (MT), (B) soybean yield (kg/ha) and  
870 per hectare total foliar fungicide use (g), and regional scale quadratic relationship between (C)  
871 total soybean production (1,000 MT) and foliar fungicide use (MT), and (D) soybean yield (kg/ha)  
872 and per hectare total foliar fungicide use (g). Each data point represents a state in a given year. All  
873 plots contain data during 2005 to 2015 from 28 soybean growing states including AL, AR, DE,  
874 FL, GA, IA, IL, IN, KS, KY, LA, MD, MI, MN, MO, MS, NC, ND, NE, OH, OK, PA, SC, SD,  
875 TN, TX, VA, and WI. Fungicides included: quinone outside inhibitors = azoxystrobin,  
876 fluoxastrobin, picoxystrobin, pyraclostrobin, trifloxystrobin; demethylation inhibitors =  
877 cyproconazole, difenoconazole, flutriafol, propiconazole, prothioconazole, tebuconazole,  
878 tetraconazole; methyl benzimidazole carbamates = thiophanate-methyl; multi-site mode of action  
879 = chlorothalonil; and succinate dehydrogenase inhibitors = fluxapyroxad.

880

881 **Fig 6.** FAMD factor maps obtained from the factor analysis with mixed data approach (FAMD  
882 analysis), showing the variance maximizing distribution pattern of data points ( $n = 308$ , each data  
883 point represent foliar fungicide use in g/ha) in the map space with their clustering patterns based  
884 upon state ( $n = 28$ ), year ( $n = 11$ ), region ( $n = 2$ ), and yield/harvest/production zones ( $n = 4$  in each  
885 case). Yield/Harvest/Production zones = represent four levels (zone 1 to 4) based on the quartiles  
886 within a database containing 308 yield (kg/ha)/harvest area (ha)/production (MT) data points ( $308$   
887 =  $11 \text{ years} \times 28 \text{ states}$ ). Within this database, data points from the minimum to the first quartile  
888 were classified as zone 1. Similarly, data points from the first quartile to median, median to the  
889 third quartile, and  $>$  third quartile were respectively classified as zones 2, 3, and 4. Foliar  
890 fungicides included: quinone outside inhibitors = azoxystrobin, fluoxastrobin, picoxystrobin,

891 pyraclostrobin, trifloxystrobin; demethylation inhibitors = cyproconazole, difenoconazole,  
892 flutriafol, propiconazole, prothioconazole, tebuconazole, tetraconazole; methyl benzimidazole  
893 carbamates = thiophanate-methyl; multi-site mode of action = chlorothalonil; and succinate  
894 dehydrogenase inhibitors = fluxapyroxad (effective against anthracnose, Cercospora leaf blight  
895 (purple seed stain), frog-eye leaf spot, Rhizoctonia aerial blight, Sclerotinia stem rot (White mold),  
896 Septoria brown spot, and soybean rust)

897

898 **Fig 7.** Comparison of the mean per hectare foliar fungicide use (in g) among  
899 yield/harvest/production zones. Treatment means with different letter designations (within each  
900 zone type) are significantly different at  $\alpha = 0.05$  based on the adjustment for multiple comparison  
901 using Tukey-Kramer test. Error bars represent standard errors. Foliar fungicides included: quinone  
902 outside inhibitors = azoxystrobin, fluoxastrobin, picoxystrobin, pyraclostrobin, trifloxystrobin;  
903 demethylation inhibitors = cyproconazole, difenoconazole, flutriafol, propiconazole,  
904 prothioconazole, tebuconazole, tetraconazole; methyl benzimidazole carbamates = thiophanate-  
905 methyl; multi-site mode of action = chlorothalonil; and succinate dehydrogenase inhibitors =  
906 fluxapyroxad (effective against anthracnose, Cercospora leaf blight (purple seed stain), frog-eye  
907 leaf spot, Rhizoctonia aerial blight, Sclerotinia stem rot (White mold), Septoria brown spot, and  
908 soybean rust)

909

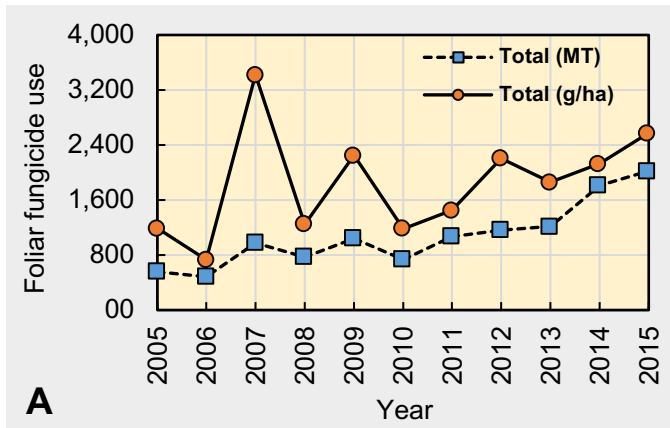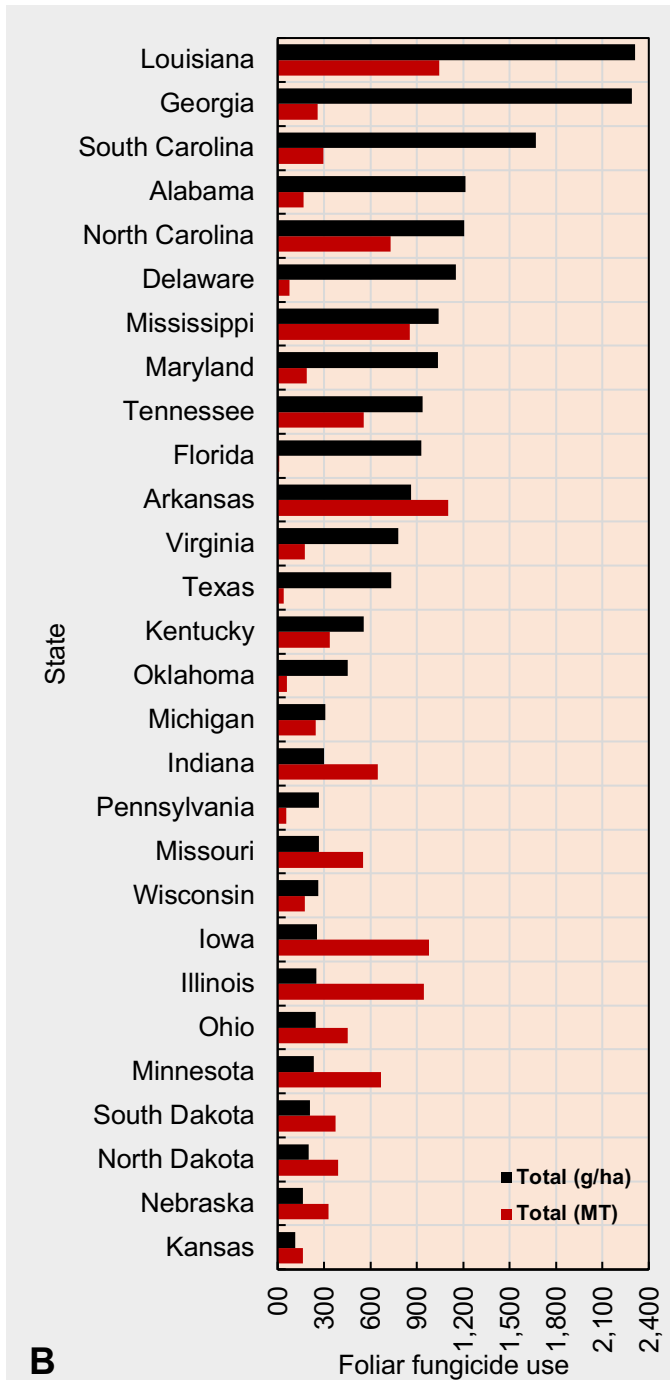

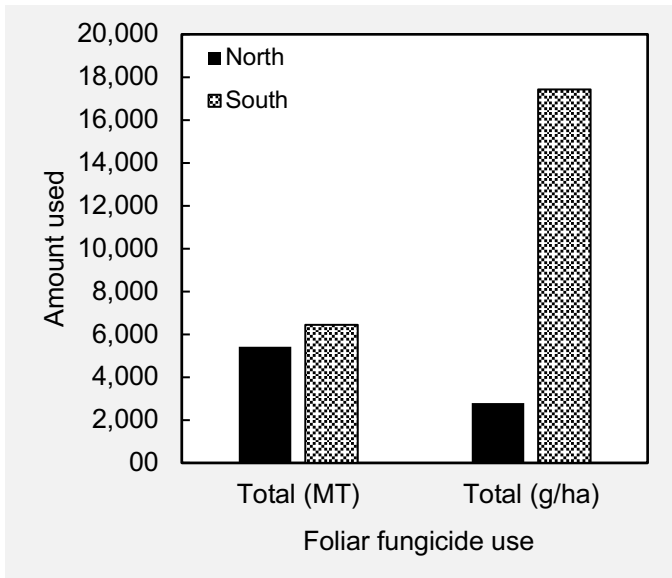

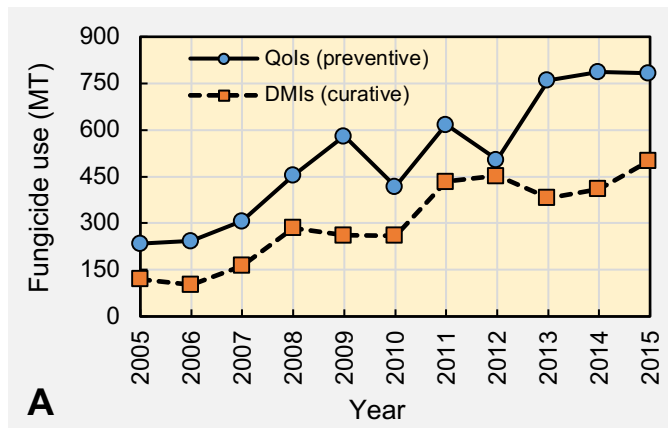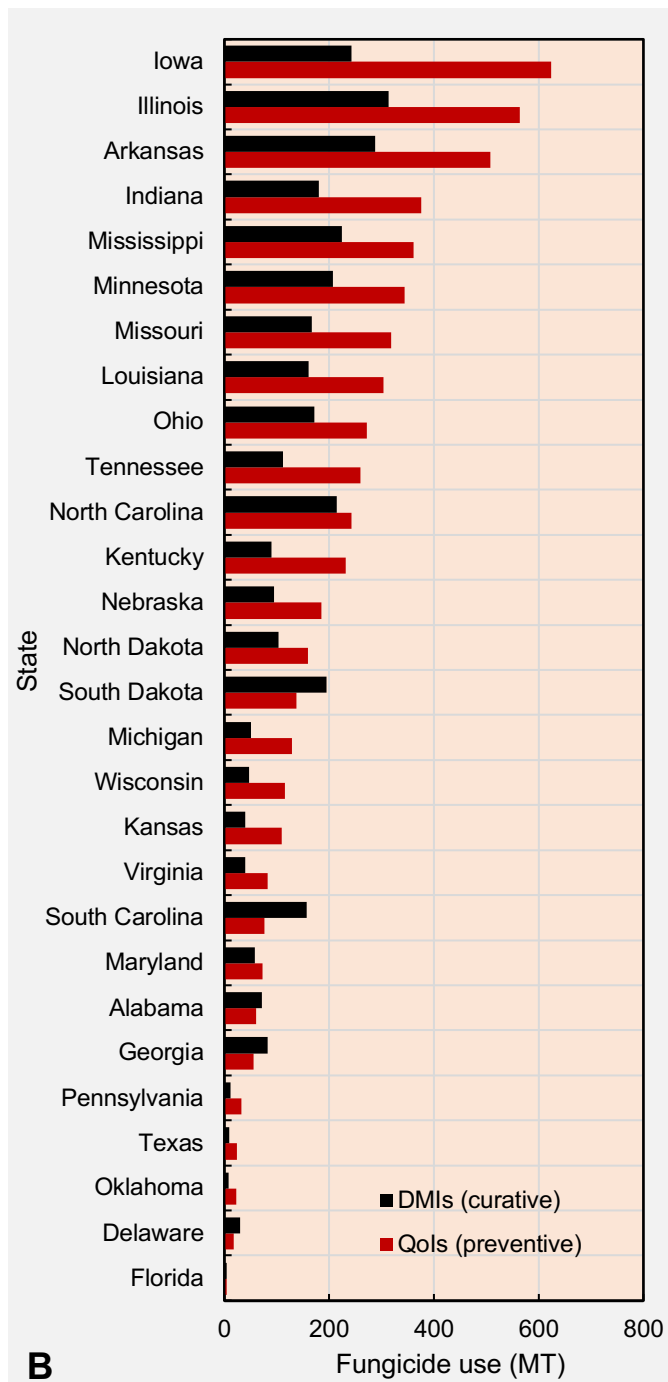

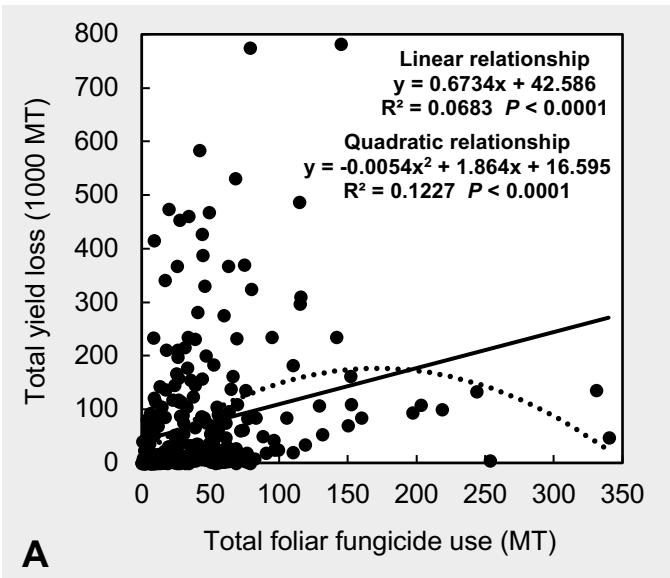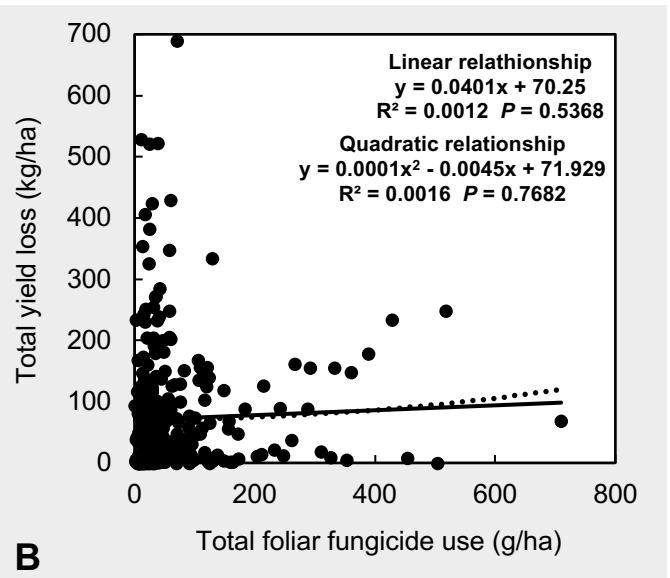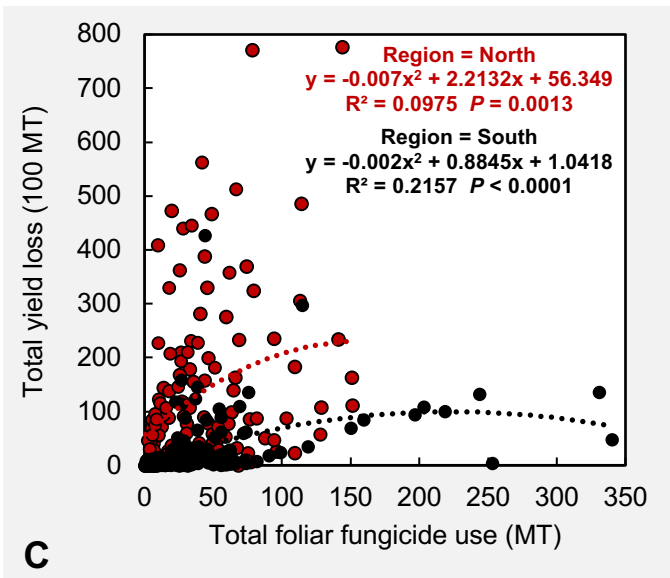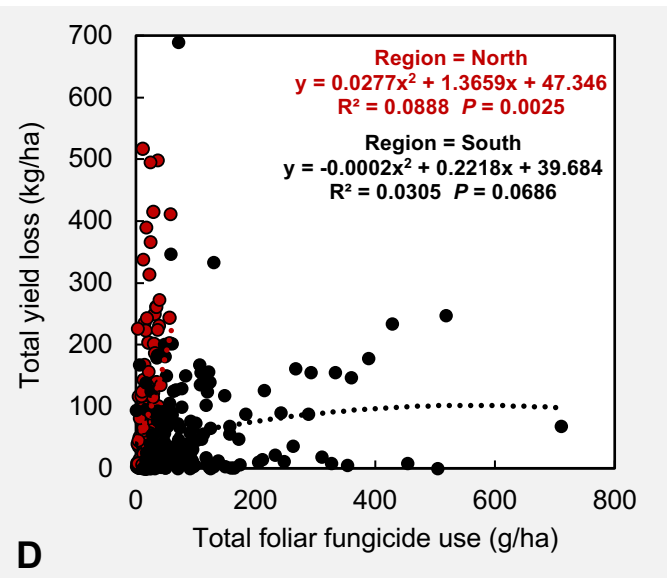

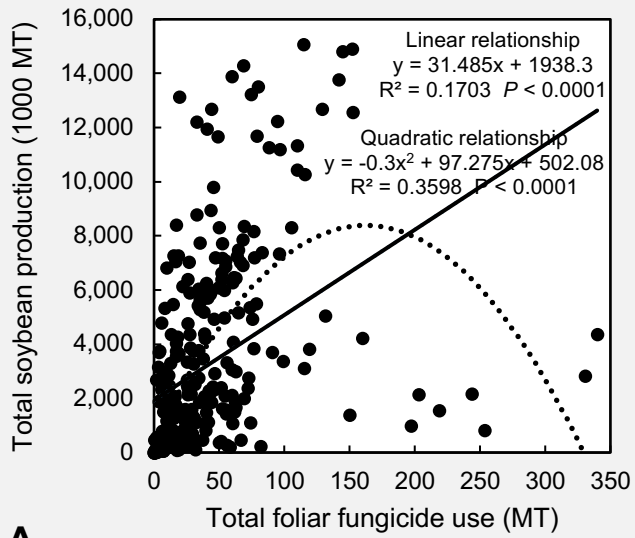

**A**

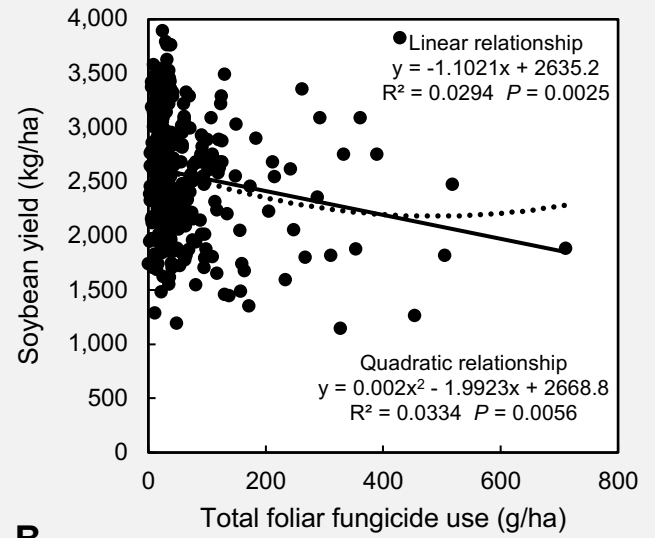

**B**

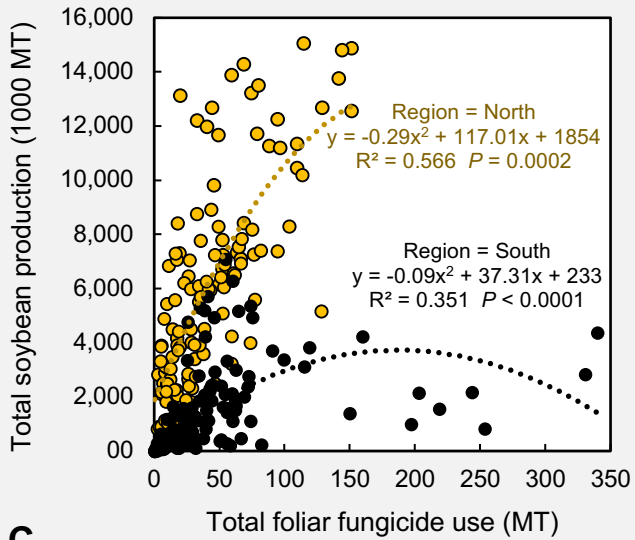

**C**

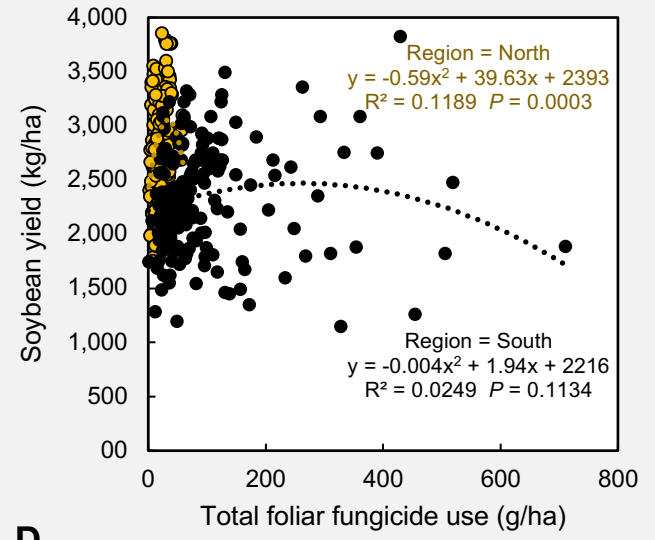

**D**

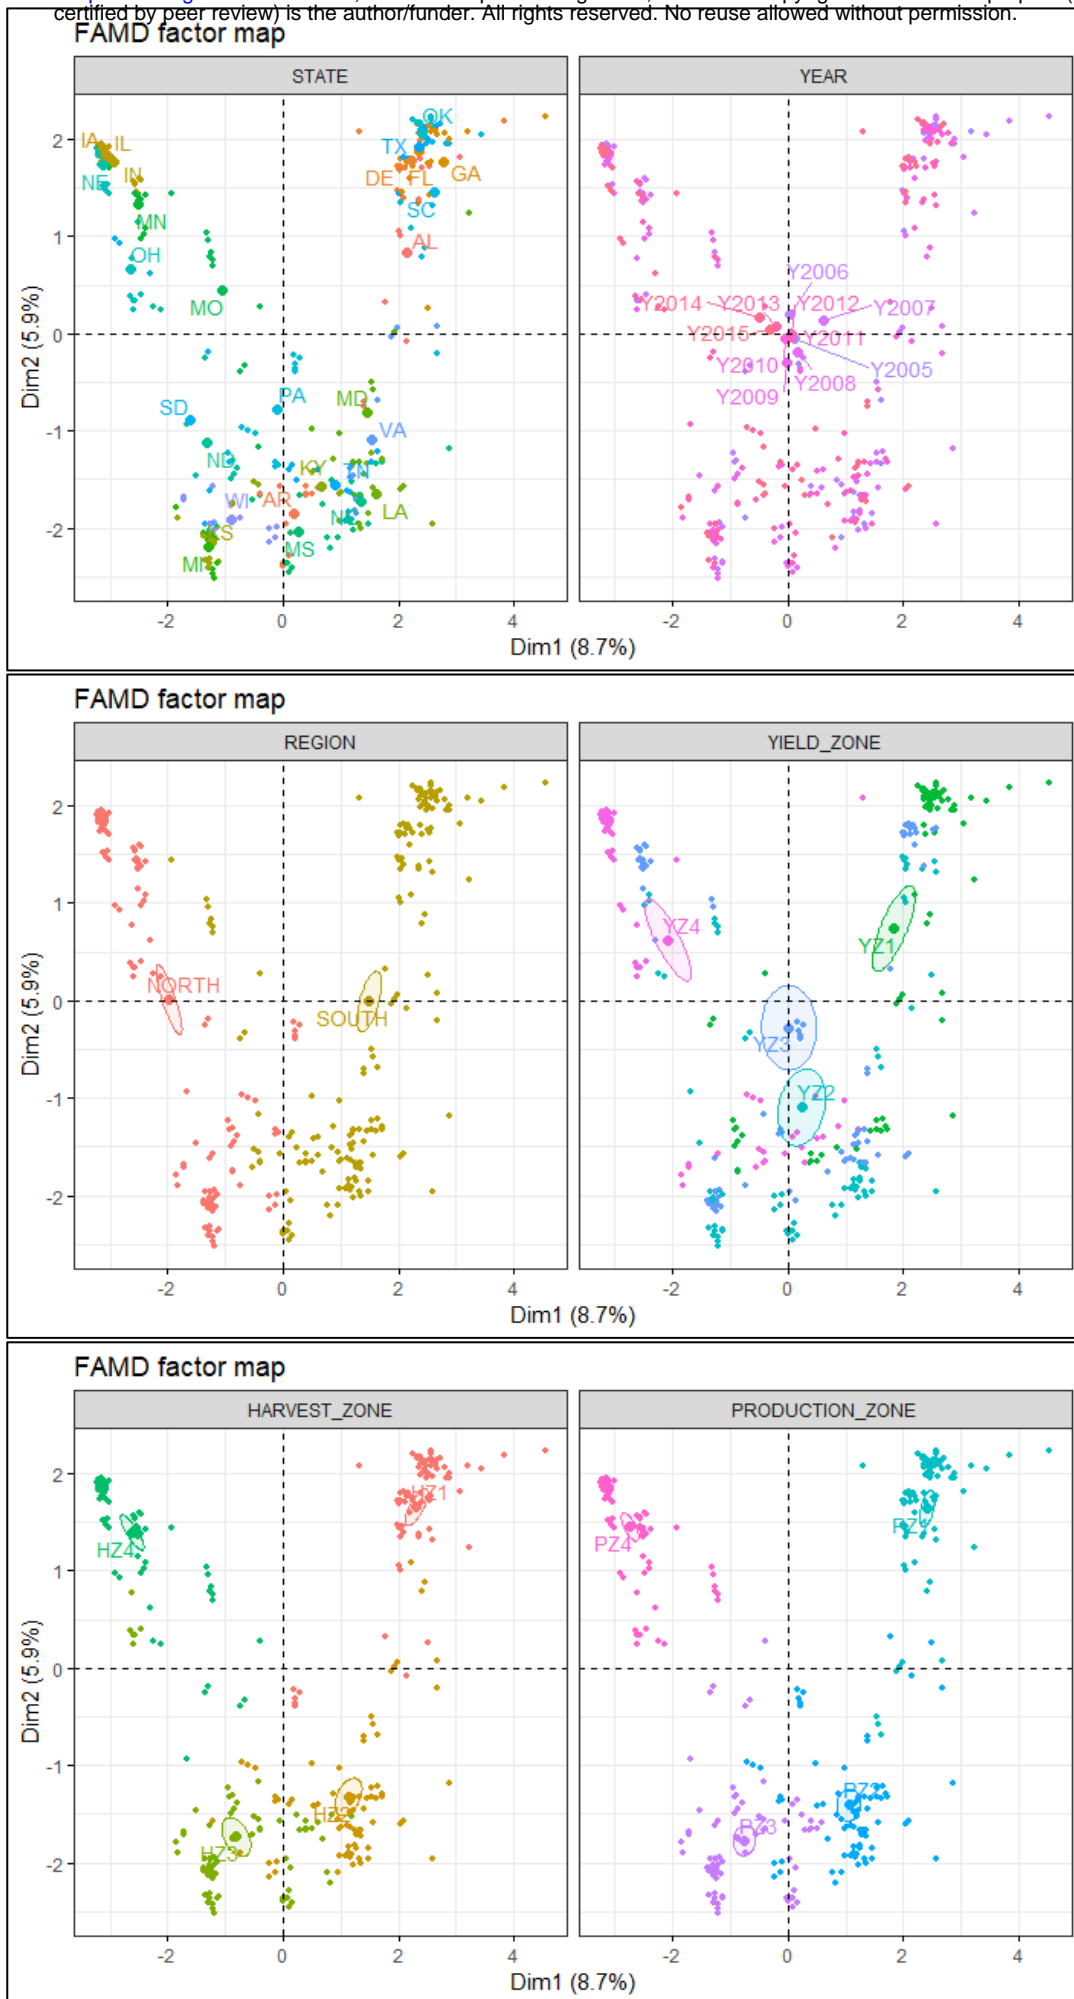



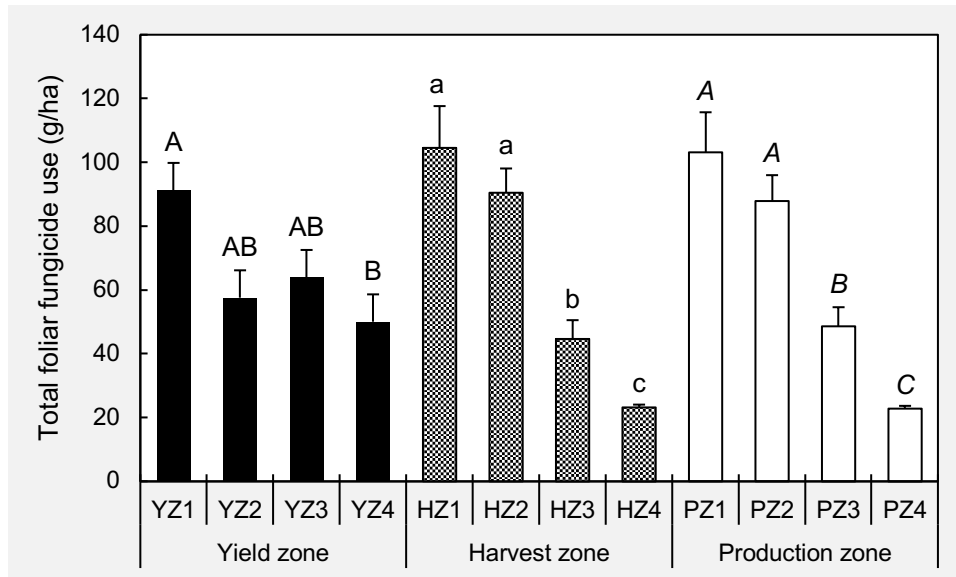

Source: https://www.biorxiv.org/content/10.1101/744581v1.full.pdf
